# Supplementary material
Source: PubMed Central journal article supplement (PMC4794029)
Supplement: abri021963.ww1_default.pdf [file abri021963.ww1_default.pdf]

## Appendix 1.

### List of included randomised trials with related review and classification according to the type of intention-to-treat reporting

| Review    | Randomised trial   | Journal      | Year | Title                                                                                                                                                                                                                                                                                     | Type of ITT           |
|-----------|--------------------|--------------|------|-------------------------------------------------------------------------------------------------------------------------------------------------------------------------------------------------------------------------------------------------------------------------------------------|-----------------------|
| Azim 2009 | <b>Paccagnella</b> | J Clin Oncol | 2006 | Adding gemcitabine to paclitaxel/carboplatin combination increases survival in advanced non-small-cell lung cancer: results of a phase II-III study.                                                                                                                                      | <i>mITT trial</i>     |
| Azim 2009 | <b>Comella</b>     | J Clin Oncol | 2000 | Randomized trial comparing cisplatin, gemcitabine, and vinorelbine with either cisplatin and gemcitabine or cisplatin and vinorelbine in advanced non-smallcell lung cancer: interim analysis of a phase III trial of the Southern Italy Cooperative Oncology Group                       | <i>ITT trial</i>      |
| Azim 2009 | <b>Laack</b>       | J Clin Oncol | 2004 | Randomized phase III study of gemcitabine and vinorelbine versus gemcitabine, vinorelbine, and cisplatin in the treatment of advanced non-small-cell lung cancer: from the German and Swiss Lung Cancer Study Group                                                                       | <i>ITT trial</i>      |
| Azim 2009 | <b>Comella</b>     | Ann Oncol    | 2007 | Efficacy of the combination of cisplatin with either gemcitabine and vinorelbine or gemcitabine and paclitaxel in the treatment of locally advanced or metastatic non-small-cell lung cancer: a phase III randomised trial of the Southern Italy Cooperative Oncology Group (SICOG 0101). | <i>ITT trial</i>      |
| Azim 2009 | <b>Comella</b>     | Semin Oncol  | 2001 | Phase III trial of cisplatin/gemcitabine with or without vinorelbine or paclitaxel in advanced non-small cell lung cancer                                                                                                                                                                 | <i>"no ITT trial"</i> |
| Azim 2009 | <b>Alberola</b>    | J Clin Oncol | 2003 | Cisplatin plus gemcitabine versus a cisplatin-based triplet versus nonplatinum sequential doublets in advanced non-small-cell lung cancer: a Spanish Lung Cancer Group phase III randomized trial.                                                                                        | <i>"no ITT trial"</i> |

|            |                               |                               |      |                                                                                                                                                                   |                       |
|------------|-------------------------------|-------------------------------|------|-------------------------------------------------------------------------------------------------------------------------------------------------------------------|-----------------------|
| Bai 2008   | <b>Rokke</b>                  | Scand J gastroenterol         | 2007 | Early treatment of severe pancreatitis with imipenem: A prospective randomized clinical trial                                                                     | <i>"no ITT trial"</i> |
| Bai 2008   | <b>Isenmann</b>               | Gastroenterology              | 2004 | Prophylactic antibiotic treatment in patients with predicted severe acute pancreatitis: A placebo-controlled, double-blind trial                                  | <i>mITT trial</i>     |
| Bai 2008   | <b>Dellinger</b>              | Ann Surg                      | 2007 | Early antibiotic treatment for severe acute necrotizing pancreatitis: A randomized, double-blind, placebo-controlled study                                        | <i>ITT trial</i>      |
| Bai 2008   | <b>Pederzoli</b>              | Surg Gynecol Obstet           | 1993 | A randomized multicenter clinical trial of antibiotic prophylaxis of septic complications in acute necrotizing pancreatitis with imipenem.                        | <i>"no ITT trial"</i> |
| Bai 2008   | <b>Nordback</b>               | J gastrointest surg           | 2001 | Early treatment with antibiotics reduces the need for surgery in acute necrotizing pancreatitis - a single-center randomized study                                | <i>"no ITT trial"</i> |
| Bai 2008   | <b>Sainio</b>                 | Lancet                        | 1995 | Early antibiotic treatment in acute necrotising pancreatitis                                                                                                      | <i>"no ITT trial"</i> |
| Baker 2009 | <b>Rascol</b>                 | N Engl J Med                  | 2000 | A five-year study of the incidence of dyskinesia in patients with early Parkinson's disease who were treated with ropinirole or levodopa.                         | <i>mITT trial</i>     |
| Baker 2009 | <b>Parkinson Study Group</b>  | Arch Neurol                   | 2004 | Pramipexole vs levodopa as initial treatment for Parkinson disease. A 4-year randomized controlled trial.                                                         | <i>ITT trial</i>      |
| Baker 2009 | <b>Parkinson Study Group.</b> | J Am Med Assoc                | 2000 | Pramipexole vs levodopa as initial treatment for Parkinson disease: a randomized controlled trial.                                                                | <i>ITT trial</i>      |
| Baker 2009 | <b>Nakanishi</b>              | Eur Neurol                    | 1992 | Nation wide collaborative study on the long-term effects of bromocriptine in the treatment of parkinsonian patients.                                              | <i>"no ITT trial"</i> |
| Baker 2009 | <b>Hely</b>                   | J Neurol Neurosurg Psychiatry | 1994 | The Sydney multicenter study of Parkinson's disease: a randomized, prospective five year study comparing low dose bromocriptine with low dose levodopa-carbidopa. | <i>"no ITT trial"</i> |
| Baker 2009 | <b>Bracco</b>                 | CNS Drugs                     | 2004 | The long-acting dopamine receptor agonist cabergoline in                                                                                                          | <i>"no ITT trial"</i> |

|            |                            |                               |      |                                                                                                                                                                                                                  |                       |
|------------|----------------------------|-------------------------------|------|------------------------------------------------------------------------------------------------------------------------------------------------------------------------------------------------------------------|-----------------------|
|            |                            |                               |      | early Parkinson's disease. Final results of a 5-year, double-blind, levodopa-controlled study.                                                                                                                   |                       |
| Birks 2006 | <b>Doody - DON 302</b>     | Archives of Neurology         | 2001 | Open-label, multicenter, phase 3 extension study of the safety and efficacy of donepezil in patients with Alzheimer disease.                                                                                     | <i>mITT trial</i>     |
| Birks 2006 | <b>Raskind - GAL-USA-1</b> | Neurology                     | 2000 | Galantamine in AD: A 6-month randomized placebo-controlled trial with a 6-month extension.                                                                                                                       | <i>mITT trial</i>     |
| Birks 2006 | <b>Rösler - RIV-B303</b>   | BMJ                           | 1999 | Efficacy and safety of rivastigmine inpatients with Alzheimer's disease: international randomised controlled trial.                                                                                              | <i>ITT trial</i>      |
| Birks 2006 | <b>Burns - DON 304</b>     | Dement Geriatr Cogn Disord    | 1999 | The effects of donepezil in Alzheimer's disease - results from a multinational trial.                                                                                                                            | <i>ITT trial</i>      |
| Birks 2006 | <b>Wilcock - GAL-INT-1</b> | British Medical Journal       | 2000 | Efficacy and safety of galantamine in patients with mild to moderate Alzheimer's disease: a multicentre randomised controlled trial.                                                                             | <i>mITT trial</i>     |
| Birks 2006 | <b>Kumar - RIV-B352</b>    | European Journal of Neurology | 2000 | An efficacy and safety analysis of Exelon in Alzheimer's disease patients with concurrent vascular risk factors.                                                                                                 | <i>mITT trial</i>     |
| Brock 2006 | <b>Veldt</b>               | BMC Gastroenterol             | 2003 | Retreatment of hepatitis C non-responsive to interferon. A placebo controlled randomized trial of ribavirin monotherapy versus combination therapy with ribavirin and interferon in 121 patients in the Benelux. | <i>mITT trial</i>     |
| Brock 2006 | <b>Dusheiko</b>            | J Hepatol                     | 1996 | Ribavirin treatment for patients with chronic hepatitis C: Results of a placebo controlled study.                                                                                                                | <i>mITT trial</i>     |
| Brock 2006 | <b>Bodenheimer</b>         | J Hepatology                  | 1997 | Tolerance and Efficacy of Oral Ribavirin Treatment of Chronic Hepatitis C: A Multicenter Trial                                                                                                                   | <i>ITT</i>            |
| Brock 2006 | <b>Felipe</b>              | Braz J Infect Dis             | 2000 | A prospective and randomised study using ribavirin as monotherapy for the treatment of naive patients with chronic hepatitis C.                                                                                  | <i>"no ITT trial"</i> |

|                  |                         |                      |      |                                                                                                                                                                                                                                                                                                                   |                       |
|------------------|-------------------------|----------------------|------|-------------------------------------------------------------------------------------------------------------------------------------------------------------------------------------------------------------------------------------------------------------------------------------------------------------------|-----------------------|
| Brock 2006       | <b>Gonzalez-Peralta</b> | J Viral Hepat        | 1997 | Modulation of hepatitis C virus quasispecies heterogeneity by interferon-alpha and ribavirin therapy.                                                                                                                                                                                                             | <i>"no ITT trial"</i> |
| Brock 2006       | <b>Hoofnagle</b>        | Hepatology           | 2003 | Maintenance therapy with ribavirin in patients with chronic hepatitis C who fail to respond to combination therapy with interferon alfa and ribavirin.                                                                                                                                                            | <i>"no ITT trial"</i> |
| Brock 2006       | <b>Kakumu</b>           | Gastroenterology     | 1993 | A pilot study of ribavirin and interferon beta for the treatment of chronic hepatitis C.                                                                                                                                                                                                                          | <i>"no ITT trial"</i> |
| Brock 2006       | <b>Stanimirovic</b>     | Vojnosanit Pregl     | 2002 | Evaluation of ribavirin efficacy and tolerance in subjects with chronic hepatitis C virus infection.                                                                                                                                                                                                              | <i>"no ITT trial"</i> |
| Brock 2006       | <b>Di Bisceglie</b>     | Ann Intern Med       | 1995 | Ribavirin as therapy for chronic hepatitis C. A randomized, double-blind, placebo-controlled trial.                                                                                                                                                                                                               | <i>"no ITT trial"</i> |
| Coomarasamy 2008 | <b>Diedrich</b>         | Fertil Steril        | 2002 | European Israeli Study Group on Highly Purified Menotropin versus Recombinant Follicle-Stimulating Hormone. Efficacy and safety of highly purified menotropin versus recombinant follicle-stimulating hormone in in vitro fertilization/intracytoplasmic sperm injection cycles: a randomized, comparative trial. | <i>mITT trial</i>     |
| Coomarasamy 2008 | <b>Gordon</b>           | Fertil Steril        | 2001 | A randomized prospective assessor-blind evaluation of luteinizing hormone dosage and in vitro fertilization outcome.                                                                                                                                                                                              | <i>mITT trial</i>     |
| Coomarasamy 2008 | <b>Andersen (MERIT)</b> | Hum Reprod           | 2006 | Clinical outcome following stimulation with highly purified hMG or recombinant FSH in patients undergoing IVF: a randomized assessor-blind controlled trial                                                                                                                                                       | <i>ITT trial</i>      |
| Coomarasamy 2008 | <b>Balash</b>           | Reprod Biomed Online | 2003 | Ovarian responses to recombinant FSH or HMG in normogonadotrophic women following pituitary desensitization by a depot GnRH agonist for assisted reproduction                                                                                                                                                     | <i>"no ITT trial"</i> |
| Coomarasamy 2008 | <b>Kilani</b>           | Hum Reprod           | 2003 | A prospective, randomized, controlled trial comparing highly purified hMG with recombinant FSH in women undergoing ICSI: ovarian response and clinical outcomes                                                                                                                                                   | <i>"no ITT trial"</i> |

|                  |                    |                                         |      |                                                                                                                                                                                                                                                                                        |                       |
|------------------|--------------------|-----------------------------------------|------|----------------------------------------------------------------------------------------------------------------------------------------------------------------------------------------------------------------------------------------------------------------------------------------|-----------------------|
| Coomarasamy 2008 | <b>Westergaard</b> | Fertil Steril                           | 2001 | Human menopausal gonadotropin versus recombinant follicle-stimulating hormone in normogonadotropic women down-regulated with a gonadotropin-releasing hormone agonist who were undergoing in vitro fertilization and intracytoplasmic sperm injection: a prospective randomized study. | <i>"no ITT trial"</i> |
| Coomarasamy 2008 | <b>Ng</b>          | Hum Reprod                              | 2001 | HMG is as good as recombinant human FSH in terms of oocyte and embryo quality: a prospective randomized trial.                                                                                                                                                                         | <i>"no ITT trial"</i> |
| Cranney 2009     | <b>Recker</b>      | Bone                                    | 2004 | Insufficiently dosed intravenous ibandronate injections are associated with suboptimal antifracture efficacy in postmenopausal osteoporosis.                                                                                                                                           | <i>mITT trial</i>     |
| Cranney 2009     | <b>Delmas</b>      | Arthritis Rheum                         | 2006 | Intravenous ibandronate injections in postmenopausal women with osteoporosis: one-year results from the dosing intravenous administration study.                                                                                                                                       | <i>mITT trial</i>     |
| Cranney 2009     | <b>Riis</b>        | J Bone Miner Res                        | 2001 | Ibandronate: a comparison of oral daily dosing versus intermittent dosing in postmenopausal osteoporosis                                                                                                                                                                               | <i>ITT trial</i>      |
| Cranney 2009     | <b>Thiebaud</b>    | Am J Psychiatry.                        | 1997 | Three monthly intravenous injections of ibandronate in the treatment of postmenopausal osteoporosis.                                                                                                                                                                                   | <i>ITT trial</i>      |
| Cranney 2009     | <b>Adami</b>       | Bone                                    | 2004 | Efficacy and safety of ibandronate given by intravenous injection once every 3 months                                                                                                                                                                                                  | <i>ITT trial</i>      |
| Cranney 2009     | <b>Chesnut</b>     | J Bone Miner Res                        | 2004 | Effects of oral ibandronate administered daily or intermittently on fracture risk in postmenopausal osteoporosis.                                                                                                                                                                      | <i>ITT trial</i>      |
| Cranney 2009     | <b>Miller</b>      | J Bone Miner Res                        | 2005 | Monthly oral ibandronate therapy in postmenopausal osteoporosis: 1-year results from the MOBILE study.                                                                                                                                                                                 | <i>ITT trial</i>      |
| Cranney 2009     | <b>Ravn</b>        | Bone                                    | 2002 | Association between pharmacokinetics of oral ibandronate and clinical response in bone mass and bone turnover in women with postmenopausal osteoporosis.                                                                                                                               | <i>"no ITT trial"</i> |
| Dodd 2006        | <b>O'Brien</b>     | Ultrasound in Obstetrics and Gynecology | 2007 | Progesterone vaginal gel for the reduction of recurrent preterm birth: primary results from a randomized double blind placebo                                                                                                                                                          | <i>mITT trial</i>     |

|              |                      |                                 |      |                                                                                                                                                                                                              |                       |
|--------------|----------------------|---------------------------------|------|--------------------------------------------------------------------------------------------------------------------------------------------------------------------------------------------------------------|-----------------------|
|              |                      |                                 |      | controlled trial.                                                                                                                                                                                            |                       |
| Dodd 2006    | <b>Meis</b>          | New England Journal of Medicine | 2003 | Prevention of recurrent preterm delivery by 17 alpha-hydroxyprogesterone caproate.                                                                                                                           | <i>ITT trial</i>      |
| Dodd 2006    | <b>Johnson</b>       | New England Journal of Medicine | 1975 | Efficacy of 17 alpha-hydroxyprogesterone caproate in the prevention of premature labor.                                                                                                                      | <i>"no ITT trial"</i> |
| Guaiana 2010 | <b>Llorca</b>        | Journal of Clinical Psychiatry  | 2002 | Efficacy and safety of hydroxyzine in the treatment of generalized anxiety disorder: a 3-month double blind study.                                                                                           | <i>mITT trial</i>     |
| Guaiana 2010 | <b>Lader</b>         | Psychopharmacology              | 1998 | Amulticentre double-blind comparison of hydroxyzine, buspirone and placebo in patients with generalized anxiety disorder.                                                                                    | <i>ITT trial</i>      |
| Guaiana 2010 | <b>Rickels</b>       | Comprehensive Psychiatry        | 1970 | Hydroxyzine and chlordiazepoxide in anxious neurotic outpatients: a collaborative controlled study.                                                                                                          | <i>"no ITT trial"</i> |
| Guaiana 2010 | <b>Darcis</b>        | Human Psychopharmacology        | 1995 | A multicentre double-blind placebo-controlled study investigating the anxiolytic efficacy of hydroxyzine in patients with generalized anxiety.                                                               | <i>"no ITT trial"</i> |
| Harris 2010  | <b>Di Leo</b>        | J Clin Oncol                    | 2008 | Phase III, double-blind, randomized study comparing lapatinib plus paclitaxel with placebo plus paclitaxel as first-line treatment for metastatic breast cancer.                                             | <i>mITT trial</i>     |
| Harris 2010  | <b>von Minckwitz</b> | J Clin Oncol                    | 2009 | Trastuzumab beyond progression in human epidermal growth factor receptor 2-positive advanced breast cancer: a German breast group 26/breast international group 03-05 study.                                 | <i>ITT trial</i>      |
| Harris 2010  | <b>Slamon</b>        | N Engl J Med                    | 2001 | Use of chemotherapy plus a monoclonal antibody against HER2 for metastatic breast cancer that overexpresses HER2.                                                                                            | <i>ITT trial</i>      |
| Harris 2010  | <b>Cameron</b>       | Breast Cancer Res Treat         | 2008 | A phase III randomized comparison of lapatinib plus capecitabine versus capecitabine alone in women with advanced breast cancer that has progressed on trastuzumab: updated efficacy and biomarker analyses. | <i>ITT trial</i>      |
| Humber 2007  | <b>Fleming 2004</b>  | J Clin Oncol                    | 2004 | Phase III trial of doxorubicin plus cisplatin with or without                                                                                                                                                | <i>mITT trial</i>     |

|             |                     |                             |      |                                                                                                                                                                                             |                       |
|-------------|---------------------|-----------------------------|------|---------------------------------------------------------------------------------------------------------------------------------------------------------------------------------------------|-----------------------|
|             |                     |                             |      | paclitaxel plus filgrastim in advanced endometrial carcinoma: a Gynecologic Oncology Group Study.                                                                                           |                       |
| Humber 2007 | <b>Aapro</b>        | Ann Oncol                   | 2003 | Doxorubicin versus doxorubicin and cisplatin in endometrial carcinoma: definitive results of a randomised study (55872) by the EORTC Gynaecological Cancer Group.                           | <i>ITT trial</i>      |
| Humber 2007 | <b>Thigpen 2004</b> | J Clin Oncol                | 2004 | Phase III trial of doxorubicin with or without cisplatin in advanced endometrial carcinoma: a Gynecologic Oncology Group study.                                                             | <i>ITT trial</i>      |
| Humber 2007 | <b>Thigpen 1994</b> | J Clin Oncol                | 1994 | A randomized comparison of doxorubicin alone versus doxorubicin plus cyclophosphamide in the management of advanced or recurrent endometrial carcinoma: a Gynecologic Oncology Group study. | <i>"no ITT trial"</i> |
| Humber 2007 | <b>Edmonson</b>     | Gynecol Oncol               | 1987 | Randomized phase II studies of cisplatin and a combination of cyclophosphamide-doxorubicin-cisplatin (CAP) in patients with progestin-refractory advanced endometrial carcinoma.            | <i>"no ITT trial"</i> |
| Imran 2008  | <b>Bucaneve</b>     | N Engl J Med                | 2005 | Levofloxacin to prevent bacterial infection in patients with cancer and neutropenia                                                                                                         | <i>mITT trial</i>     |
| Imran 2008  | <b>Cullen</b>       | N Engl J Med                | 2005 | Antibacterial prophylaxis after chemotherapy for solid tumors and lymphomas                                                                                                                 | <i>ITT trial</i>      |
| Imran 2008  | <b>Lew</b>          | Transplantation             | 1991 | Prophylaxis of bacterial infections with ciprofloxacin in patients undergoing bone marrow transplantation                                                                                   | <i>ITT trial</i>      |
| Imran 2008  | <b>Schroeder</b>    | Onkologie                   | 1992 | Antibiotic prophylaxis with gyrase inhibitors during cytostatically induced granulocytopenias in patients with solid tumors: a double-blind prospective randomized study                    | <i>"no ITT trial"</i> |
| Imran 2008  | <b>Talbot</b>       | Antimicrob Agents Chemother | 1993 | Oral enoxacin for infection prevention in adults with acute nonlymphocytic leukemia. The Enoxacin Prophylaxis Study Group                                                                   | <i>"no ITT trial"</i> |
| Imran 2008  | <b>Karp</b>         | Ann Intern Med              | 1987 | Oral norfloxacin for prevention of gram-negative bacterial infections in patients with acute leukemia and                                                                                   | <i>"no ITT trial"</i> |

|                 |                        |                 |      |                                                                                                                                                                                                                       |                       |
|-----------------|------------------------|-----------------|------|-----------------------------------------------------------------------------------------------------------------------------------------------------------------------------------------------------------------------|-----------------------|
|                 |                        |                 |      | granulocytopenia. A randomized, double-blind, placebo-controlled trial                                                                                                                                                |                       |
| Jang 2009       | <b>Kassell</b>         | J Neurosurg     | 1996 | Randomized, double-blind, vehicle-controlled trial of tirilazad mesylate in patients with aneurysmal subarachnoid hemorrhage: a cooperative study in Europe, Australia, and New Zealand.                              | <i>mITT trial</i>     |
| Jang 2009       | <b>Lanzino part I</b>  | J Neurosurg     | 1999 | Double-blind, randomized, vehicle-controlled study of high-dose tirilazad mesylate in women with aneurysmal subarachnoid hemorrhage. Part I. A cooperative study in Europe, Australia, New Zealand, and South Africa. | <i>ITT trial</i>      |
| Jang 2009       | <b>Haley 1997</b>      | J Neurosurg     | 1997 | A randomized, double-blind, vehicle-controlled trial of tirilazad mesylate in patients with aneurysmal subarachnoid hemorrhage: a cooperative study in North America.                                                 | <i>"no ITT trial"</i> |
| Jang 2009       | <b>Lanzino part II</b> | J Neurosurg     | 1999 | Double-blind, randomized, vehicle-controlled study of high-dose tirilazad mesylate in women with aneurysmal subarachnoid hemorrhage. Part II. A cooperative study in North America.                                   | <i>"no ITT trial"</i> |
| Jang 2009       | <b>Haley 1995</b>      | J Neurosurg     | 1995 | Phase II trial of tirilazad in aneurysmal subarachnoid hemorrhage. A report of the Cooperative Aneurysm Study.                                                                                                        | <i>"no ITT trial"</i> |
| Jefferson 2007  | <b>Hayden</b>          | N Engl J Med    | 1999 | Use of the selective oral neuraminidase inhibitor oseltamivir to prevent influenza.                                                                                                                                   | <i>mITT trial</i>     |
| Jefferson 2007  | <b>Kaiser</b>          | Clin Infect Dis | 2000 | Short-term treatment with zanamivir to prevent influenza: results of a placebocontrolled study.                                                                                                                       | <i>ITT</i>            |
| Katchamart 2009 | <b>Lehman AJ</b>       | Arthritis Rheum | 2005 | A 48-week, randomized, double-blind, double-observer, placebo-controlled multicenter trial of combination methotrexate and intramuscular gold therapy in rheumatoid arthritis: results of the METGO study.            | <i>mITT trial</i>     |
| Katchamart 2009 | <b>Kremer</b>          | Ann Intern Med  | 2002 | Concomitant leflunomide therapy in patients with active rheumatoid arthritis despite stable doses of methotrexate. A                                                                                                  | <i>ITT trial</i>      |



|                 |                   |                                                   |      |                                                                                                                                                                                                      |                       |
|-----------------|-------------------|---------------------------------------------------|------|------------------------------------------------------------------------------------------------------------------------------------------------------------------------------------------------------|-----------------------|
|                 |                   |                                                   |      | randomized, double-blind, placebo-controlled trial.                                                                                                                                                  |                       |
| Katchamart 2009 | <b>Tugwell</b>    | N Engl J Med                                      | 1995 | Combination therapy with cyclosporine and methotrexate in severe rheumatoid arthritis. The Methotrexate-Cyclosporine Combination Study Group.                                                        | <i>"no ITT trial"</i> |
| Katchamart 2009 | <b>Ogrendik</b>   | South Med J                                       | 2007 | Levofloxacin treatment in patients with rheumatoid arthritis receiving methotrexate.                                                                                                                 | <i>"no ITT trial"</i> |
| Komossa 2010    | <b>Kordon</b>     | Journal of Clinical Psychopharmacology            | 2008 | Quetiapin addition to serotonin reuptake inhibitors in patients with severe obsessive-compulsive disorder.                                                                                           | <i>mITT trial</i>     |
| Komossa 2010    | <b>Denys</b>      | Journal of Clinical Psychiatry                    | 2004 | A double-blind, randomized, placebo-controlled trial of quetiapine addition in patients with obsessive-compulsive disorder refractory to serotonin reuptake inhibitors.                              | <i>mITT trial</i>     |
| Komossa 2010    | <b>Vulink</b>     | Journal of Clinical Psychiatry online publication | 2009 | Quetiapine augments the effect of citalopram in non-refractory obsessive-compulsive disorder: A randomized, double-blind, placebo-controlled study of 76 patients.                                   | <i>ITT trial</i>      |
| Komossa 2010    | <b>Fineberg</b>   | International Clinical Psychopharmacology         | 2005 | Adding Quetiapine to SRI in treatment-resistant obsessive-compulsive disorder: a randomized controlled treatment study.                                                                              | <i>ITT trial</i>      |
| Komossa 2010    | <b>Carey</b>      | BMC Psychiatry                                    | 2005 | Quetiapine augmentation of SRIs in treatment refractory obsessive-compulsive disorder: a double-blind, randomised, placebo-controlled study.                                                         | <i>"no ITT trial"</i> |
| Kosmas 2008     | <b>Lambalk</b>    | Human Reprod                                      | 2006 | Treatment with the GnRH antagonist ganirelix prevents premature LH rises and luteinization in stimulated intrauterine insemination: results of a double-blind, placebo-controlled, multicentre trial | <i>mITT trial</i>     |
| Kosmas 2008     | <b>Crosignani</b> | Human Reprod                                      | 2007 | Effect of GnRH antagonists in FSHmildly stimulated intrauterine insemination cycles: a multicentre randomized trial                                                                                  | <i>ITT trial</i>      |
| Kosmas 2008     | <b>Checa</b>      | Fertil Steril                                     | 2006 | Use of gonadotropin-releasing hormone antagonists to overcome the drawbacks of intrauterine insemination on weekends                                                                                 | <i>"no ITT trial"</i> |

|             |                       |                     |      |                                                                                                                                                                                                                                                                                |                       |
|-------------|-----------------------|---------------------|------|--------------------------------------------------------------------------------------------------------------------------------------------------------------------------------------------------------------------------------------------------------------------------------|-----------------------|
| Kosmas 2008 | <b>Allegra</b>        | Human Reprod        | 2007 | GnRH antagonist-induced inhibition of the premature LH surge increases pregnancy rates in IUI-stimulated cycles. A prospective randomized trial                                                                                                                                | <i>"no ITT trial"</i> |
| Kosmas 2008 | <b>Gomez-Palomero</b> | Human Reprod        | 2005 | Timing ovulation for intrauterine insemination with a GnRH antagonist.                                                                                                                                                                                                         | <i>"no ITT trial"</i> |
| Kosmas 2008 | <b>Williams</b>       | Am J Obstet Gynecol | 2004 | A randomized, multicenter study comparing the efficacy of recombinant FSH vs recombinant FSH with Ganirelix during superovulation/IUI therapy                                                                                                                                  | <i>"no ITT trial"</i> |
| Lee 2008    | <b>Keystone</b>       | Arthritis Rheum     | 2004 | Radiographic, clinical, and functional outcomes of treatment with adalimumab (a human anti-tumor necrosis factor monoclonal antibody) in patients with active rheumatoid arthritis receiving concomitant methotrexate therapy: a randomized, placebo-controlled, 52-week trial | <i>mITT trial</i>     |
| Lee 2008    | <b>Klareskog</b>      | Lancet              | 2004 | Therapeutic effect of the combination of etanercept and methotrexate compared with each treatment alone in patients with rheumatoid arthritis: double-blind randomised controlled trial                                                                                        | <i>ITT trial</i>      |
| Lee 2008    | <b>Lipsky</b>         | N Engl J Med        | 2000 | Infliximab and methotrexate in the treatment of rheumatoid arthritis. Anti-tumor necrosis factor trial in rheumatoid arthritis with concomitant therapy study group                                                                                                            | <i>"no ITT trial"</i> |
| Leucht ARI  | <b>Kane</b>           | J Clin Psychiatry   | 2002 | Efficacy and safety of aripiprazole and haloperidol versus placebo in patients with schizophrenia and schizoaffective disorder.                                                                                                                                                | <i>mITT trial</i>     |
| Leucht ARI  | <b>Study 138001.</b>  | Medical review(s).  | 2002 | Center for Drug Evaluation and Research                                                                                                                                                                                                                                        | <i>mITT trial</i>     |
| Leucht ARI  | <b>Study 93202.</b>   | Medical review(s).  | 2002 | Center for Drug Evaluation and Research.                                                                                                                                                                                                                                       | <i>mITT trial</i>     |
| Leucht ARI  | <b>Potkin 2003</b>    | Arch Gen Psychiatry | 2003 | Aripiprazole, an antipsychotic with a novel mechanism of action, and risperidone vs placebo in patients with schizophrenia and schizoaffective disorder.                                                                                                                       | <i>ITT trial</i>      |

|            |                      |                         |      |                                                                                                                                                                                 |                   |
|------------|----------------------|-------------------------|------|---------------------------------------------------------------------------------------------------------------------------------------------------------------------------------|-------------------|
| Leucht HAL | <b>Arvanitis</b>     | Biol Psychiatry         | 1997 | Seroquel Trial 13 Study Group. Multiple fixed doses of 'seroquel' (quetiapine) in patients with acute exacerbation of schizophrenia: a comparison with haloperidol and placebo. | <i>mITT trial</i> |
| Leucht HAL | <b>Borison</b>       | J Clin Psychopharmacol  | 1996 | ICI 204,636 an atypical antipsychotic efficacy and safety in a multicenter placebo-controlled trial in patients with schizophrenia.                                             | <i>mITT trial</i> |
| Leucht HAL | <b>Kane</b>          | J Clin Psychiatry       | 2002 | Efficacy and safety of aripiprazole and haloperidol versus placebo in patients with schizophrenia and schizoaffective disorder.                                                 | <i>mITT trial</i> |
| Leucht HAL | <b>Study 93202.</b>  | Medical review(s).      | 2002 | Center for Drug Evaluation and Research.                                                                                                                                        | <i>mITT trial</i> |
| Leucht HAL | <b>Beasley 1996a</b> | Neuropsychopharmacology | 1996 | Olanzapine versus haloperidol and placebo. Acute phase results of the American double-blind olanzapine trial.                                                                   | <i>ITT trial</i>  |
| Leucht HAL | <b>Chouinard</b>     | J Clin Psychopharmacol  | 1993 | Canadian placebo-controlled study of fixed doses of risperidone and haloperidol in the treatment of chronic schizophrenic patients.                                             | <i>ITT trial</i>  |
| Leucht HAL | <b>Marder</b>        | Am J Psychiatry         | 1994 | Risperidone in the treatment of schizophrenia.                                                                                                                                  | <i>ITT trial</i>  |
| Leucht OLA | <b>Beasley 1996b</b> | Psychopharmacology      | 1996 | Olanzapine versus placebo: results of a double-blind fixed dose olanzapine trial.                                                                                               | <i>ITT trial</i>  |
| Leucht OLA | <b>Beasley 1996a</b> | Neuropsychopharmacology | 1996 | Olanzapine versus haloperidol and placebo. Acute phase results of the American double-blind olanzapine trial.                                                                   | <i>ITT trial</i>  |
| Leucht QUE | <b>Arvanitis</b>     | Biol Psychiatry         | 1997 | Seroquel Trial 13 Study Group. Multiple fixed doses of 'seroquel' (quetiapine) in patients with acute exacerbation of schizophrenia: a comparison with haloperidol and placebo. | <i>mITT trial</i> |
| Leucht QUE | <b>Borison</b>       | J Clin Psychopharmacol  | 1996 | ICI 204,636 an atypical antipsychotic efficacy and safety in a multicenter placebo-controlled trial in patients with schizophrenia.                                             | <i>mITT trial</i> |
| Leucht QUE | <b>Potkin 2006</b>   | Schizophr Res           | 2006 | A double-blind comparison of risperidone, quetiapine and placebo in patients with schizophrenia experiencing an acute                                                           | <i>mITT trial</i> |

|                |                        |                        |      |                                                                                                                                                               |                       |
|----------------|------------------------|------------------------|------|---------------------------------------------------------------------------------------------------------------------------------------------------------------|-----------------------|
|                |                        |                        |      | exacerbation requiring hospitalization.                                                                                                                       |                       |
| Leucht QUE     | <b>Small</b>           | Arch Gen Psychiatry    | 1997 | Quetiapine in patients with schizophrenia. A high- and low-dose comparison with placebo.                                                                      | <i>mITT trial</i>     |
| Leucht QUE     | <b>Fabre</b>           | Clin Ther              | 1995 | Seroquel™ (ICI 204,636), a novel, atypical antipsychotic: early indication of safety and efficacy in patients with chronic and subchronic schizophrenia.      | <i>“no ITT trial”</i> |
| Leucht RIS     | <b>Potkin 2006</b>     | Schizophr Res          | 2006 | A double-blind comparison of risperidone, quetiapine and placebo in patients with schizophrenia experiencing an acute exacerbation requiring hospitalization. | <i>mITT trial</i>     |
| Leucht RIS     | <b>Bai</b>             | J Clin Psychiatry      | 2003 | Risperidone for severe tardive dyskinesia: a 12-week randomized, double-blind, placebo-controlled study.                                                      | <i>ITT trial</i>      |
| Leucht RIS     | <b>Chouinard</b>       | J Clin Psychopharmacol | 1993 | Canadian placebo-controlled study of fixed doses of risperidone and haloperidol in the treatment of chronic schizophrenic patients.                           | <i>ITT trial</i>      |
| Leucht RIS     | <b>Marder</b>          | Am J Psychiatry        | 1994 | Risperidone in the treatment of schizophrenia.                                                                                                                | <i>ITT trial</i>      |
| Leucht RIS     | <b>Potkin 2003</b>     | Arch Gen Psychiatry    | 2003 | Aripiprazole, an antipsychotic with a novel mechanism of action, and risperidone vs placebo in patients with schizophrenia and schizoaffective disorder.      | <i>ITT trial</i>      |
| Leucht RIS     | <b>Borison</b>         | Psychopharmacol Bull   | 1992 | Risperidone— clinical safety and efficacy in schizophrenia.                                                                                                   | <i>“no ITT trial”</i> |
| Mariappan 2006 | <b>Cardozo</b>         | Obstet Gynecol         | 2004 | Pharmacological treatment of women awaiting surgery for stress urinary incontinence.                                                                          | <i>mITT trial</i>     |
| Mariappan 2006 | <b>Dmochowski</b>      | J Urol                 | 2003 | Duloxetine versus placebo for the treatment of North American women with stress urinary incontinence.                                                         | <i>mITT trial</i>     |
| Mariappan 2006 | <b>van Kerrebroeck</b> | BJOG                   | 2004 | Duloxetine versus placebo in the treatment of European and Canadian women with stress urinary incontinence.                                                   | <i>mITT trial</i>     |
| Mariappan 2006 | <b>Millard</b>         | BJU Int                | 2004 | Duloxetine vs placebo in the treatment of stress urinary incontinence: a four-continent randomized clinical trial.                                            | <i>ITT</i>            |

|              |                         |                         |      |                                                                                                                                                                                             |                   |
|--------------|-------------------------|-------------------------|------|---------------------------------------------------------------------------------------------------------------------------------------------------------------------------------------------|-------------------|
| Michael 2010 | <b>Kärkkäinen</b>       | Maturitas               | 2010 | Does daily vitamin D 800 IU and calcium 1000 mg supplementation decrease the risk of falling in ambulatory women aged 65-71 years? A 3-year randomized population-based trial (OSTPRE-FPS). | <i>mITT trial</i> |
| Michael 2010 | <b>Pfeifer1</b>         | J Bone Miner Res        | 2000 | Effects of a short-term vitamin D and calcium supplementation on body sway and secondary hyperparathyroidism in elderly women.                                                              | <i>mITT trial</i> |
| Michael 2010 | <b>Pfeifer2</b>         | Osteoporos Int          | 2009 | Effects of a long-term vitamin D and calcium supplementation on falls and parameters of muscle function in community-dwelling older individuals.                                            | <i>mITT trial</i> |
| Michael 2010 | <b>Porthouse</b>        | BMJ                     | 2005 | Randomised controlled trial of calcium and supplementation with cholecalciferol (vitamin D3) for prevention of fractures in primary care. BMJ. 2005;330:1003. [PMID: 15860827]              | <i>ITT trial</i>  |
| Michael 2010 | <b>Prince</b>           | Arch Intern Med         | 2008 | Effects of ergocalciferol added to calcium on the risk of falls in elderly high-risk women.                                                                                                 | <i>ITT trial</i>  |
| Michael 2010 | <b>Bischoff-Ferrari</b> | Ann Inter Med           | 2006 | Effect of cholecalciferol plus calcium on falling in ambulatory older men and women: a 3-year randomized controlled trial                                                                   | <i>ITT trial</i>  |
| Michael 2010 | <b>Dhesi</b>            | Age Ageing              | 2004 | Vitamin D supplementation improves neuromuscular function in older people who fall                                                                                                          | <i>ITT trial</i>  |
| Michael 2010 | <b>Dukas</b>            | J Am Geriatr Soc        | 2004 | Alfacalcidol reduces the number of fallers in a community-dwelling elderly population with a minimum calcium intake of more than 500 mg daily                                               | <i>ITT trial</i>  |
| Michael 2010 | <b>Gallagher</b>        | J Clin Endocrinol Metab | 2001 | Combination treatment with estrogen and calcitriol in the prevention of age-related bone loss                                                                                               | <i>ITT trial</i>  |
| Naber 2009   | <b>Bauer</b>            | Eur Urol                | 2005 | Multicenter UTI Study Group. A long-term, multicenter, double-blind study of an Escherichia coli extract (OM-89) in female patients with recurrent urinary tract infections.                | <i>mITT trial</i> |

|             |                  |                                         |      |                                                                                                                                                                                                                                   |                       |
|-------------|------------------|-----------------------------------------|------|-----------------------------------------------------------------------------------------------------------------------------------------------------------------------------------------------------------------------------------|-----------------------|
| Naber 2009  | <b>Magasi</b>    | Eur Urol                                | 1994 | Uro-Vaxom and the management of recurrent urinary tract infection in adults: a randomized multicenter double-blind trial.                                                                                                         | <i>"no ITT trial"</i> |
| Naber 2009  | <b>Schulman</b>  | J Urol                                  | 1993 | Oral immunotherapy of recurrent urinary tract infections: a double-blind placebo-controlled multicenter study.                                                                                                                    | <i>"no ITT trial"</i> |
| Naber 2009  | <b>Tammen</b>    | Br J Urol                               | 1990 | The German Urinary Tract Infection Study Group. Immunobiotherapy with Uro-Vaxom in recurrent urinary tract infection.                                                                                                             | <i>"no ITT trial"</i> |
| Nikfar 2009 | <b>Kruis</b>     | Eur J Gastroenterol Hepatol.            | 1995 | Double-blind dose-finding study of olsalazine versus sulphasalazine as maintenance therapy for ulcerative colitis.                                                                                                                | <i>mITT trial</i>     |
| Nikfar 2009 | <b>Nilsson</b>   | Am J Gastroenterol.                     | 1995 | Olsalazine versus sulphasalazine for relapse prevention in ulcerative colitis: a multicenter study.                                                                                                                               | <i>mITT trial</i>     |
| Nikfar 2009 | <b>Kiilerich</b> | The Danish Olsalazine Study Group. Gut. | 1992 | Kiilerich S, Ladefoged K, Rannem T, Ranløv PJ. Prophylactic effects of olsalazine vs. sulfasalazine during 12 months maintenance treatment of ulcerative colitis.                                                                 | <i>mITT trial</i>     |
| Nikfar 2009 | <b>Ireland</b>   | Gut                                     | 1988 | Controlled trial comparing olsalazine and sulphasalazine for the maintenance treatment of ulcerative colitis.                                                                                                                     | <i>"no ITT trial"</i> |
| Nikfar 2009 | <b>Rijk</b>      | Am J Gastroenterol.                     | 1992 | Relapse-preventing effect and safety of sulfasalazine and olsalazine in patients with ulcerative colitis in remission: a prospective, double-blind, randomized multicenter study. The Ulcerative Colitis Multicenter Study Group. | <i>"no ITT trial"</i> |
| Nikfar 2010 | <b>Fukuda</b>    | Am J Gastroenterol                      | 2008 | Oral spherical adsorptive carbon for the treatment of intractable anal fistulas in Crohn's disease: a multicenter, randomized, double-blind, placebo-controlled trial.                                                            | <i>mITT trial</i>     |
| Nikfar 2010 | <b>Sandborn</b>  | Gastroenterology                        | 2003 | Tacrolimus for the treatment of fistulas in patients with Crohn's disease: a randomized, placebo-controlled trial.                                                                                                                | <i>mITT trial</i>     |
| Nikfar 2010 | <b>Hart</b>      | Inflamm Bowel Dis                       | 2007 | Topical tacrolimus in the treatment of perianal Crohn's disease: exploratory randomized controlled trial                                                                                                                          | <i>mITT trial</i>     |
| Nikfar 2010 | <b>Present</b>   | nejm                                    | 1999 | Infliximab for the treatment of fistulas in patients with Crohn's                                                                                                                                                                 | <i>ITT</i>            |

|                 |                   |                          |      |                                                                                                                                                                                                                                   |                       |
|-----------------|-------------------|--------------------------|------|-----------------------------------------------------------------------------------------------------------------------------------------------------------------------------------------------------------------------------------|-----------------------|
|                 |                   |                          |      | disease                                                                                                                                                                                                                           |                       |
| Obonyo 2006     | <b>Santosham</b>  | N Engl J Med             | 1991 | The efficacy in Navajo infants of a conjugate vaccine consisting of Haemophilus influenzae type b polysaccharide and Neisseria meningitidis outer-membrane protein complex.                                                       | <i>mITT trial</i>     |
| Obonyo 2006     | <b>Lagos</b>      | Pediatr Infect Dis J     | 1996 | Large-scale, postlicensure, selective vaccination of Chilean infants with PRP-T conjugate vaccine: practicality and effectiveness in preventing invasive Haemophilus influenzae type b infections.                                | <i>ITT trial</i>      |
| Obonyo 2006     | <b>Ward</b>       | N Engl J Med             | 1990 | Limited efficacy of a Haemophilus influenzae type b conjugate vaccine in Alaskan native infants.                                                                                                                                  | <i>“no ITT trial”</i> |
| Obonyo 2006     | <b>Black</b>      | Pediatr Infect Dis J     | 1991 | The Northern California Kaiser Permanente Vaccine Study Center Pediatrics Group (1991) Efficacy in infancy of oligosaccharide conjugate Haemophilus influenzae b (HBOC) vaccine in a United States population of 61 080 children. | <i>ITT trial</i>      |
| Obonyo 2006     | <b>Vadheim</b>    | Pediatrics               | 1993 | Effectiveness and safety of an Haemophilus influenzae type B conjugate vaccine (PRP-T) in young infants.                                                                                                                          | <i>“no ITT trial”</i> |
| Obonyo 2006     | <b>Eskola</b>     | N Engl J Med             | 1990 | A randomized, prospective field trial of a conjugate vaccine in the protection of infants and young children against invasive Haemophilus influenzae type b disease.                                                              | <i>“no ITT trial”</i> |
| Obonyo 2006     | <b>Booy</b>       | Lancet                   | 1994 | Efficacy of Haemophilus influenzae type b conjugate vaccine PRP-T.                                                                                                                                                                | <i>ITT trial</i>      |
| Obonyo 2006     | <b>Mulholland</b> | Lancet                   | 1997 | Randomised trial of Haemophilus influenzae type b tetanus protein conjugate for prevention of pneumonia and meningitis in Gambian infants.                                                                                        | <i>“no ITT trial”</i> |
| Papakostas 2008 | <b>Clayton</b>    | Int Clin Psychopharmacol | 2003 | Lack of sexual dysfunction with the selective noradrenaline reuptake inhibitor reboxetine during treatment for major depressive disorder                                                                                          | <i>mITT trial</i>     |
| Papakostas 2008 | <b>Andreoli</b>   | J Clin Psychopharmacol   | 2002 | Reboxetine, a new noradrenaline selective antidepressant, is at least as effective as fluoxetine in the treatment of                                                                                                              | <i>ITT trial</i>      |

|                 |                              |                                                                 |      |                                                                                                                                                                                                    |                       |
|-----------------|------------------------------|-----------------------------------------------------------------|------|----------------------------------------------------------------------------------------------------------------------------------------------------------------------------------------------------|-----------------------|
|                 |                              |                                                                 |      | depression                                                                                                                                                                                         |                       |
| Papakostas 2008 | <b>Massana</b>               | Int. Clin. Psychopharmacol                                      | 1999 | Reboxetine: a double-blind comparison with fluoxetine in major depressive disorder                                                                                                                 | <i>"no ITT trial"</i> |
| Papakostas 2008 | <b>Langworth</b>             | J Clin Psychopharmacol                                          | 2006 | Efficacy and tolerability of reboxetine compared with citalopram: a double-blind study in patients with major depressive disorder                                                                  | <i>"no ITT trial"</i> |
| Papakostas 2008 | <b>Berlanga</b>              | J Affect Disord.                                                | 2006 | Different gender response to serotonergic and noradrenergic antidepressants. A comparative study of the efficacy of citalopram and reboxetine                                                      | <i>"no ITT trial"</i> |
| Paul 2006a      | <b>Sandberg (no outcome)</b> | Scandinavian Journal of Infectious Diseases                     | 1997 | Aminoglycosides do not improve the efficacy of cephalosporins for treatment of acute pyelonephritis in women                                                                                       | <i>mITT trial</i>     |
| Paul 2006a      | <b>Dupont</b>                | Antimicrobial Agents and Chemotherapy                           | 2000 | Monotherapy with a broad-spectrum beta-lactam is as effective as its combination with an aminoglycoside in treatment of severe generalized peritonitis: a multicenter randomized controlled trial. | <i>mITT trial</i>     |
| Paul 2006a      | <b>Ribera</b>                | Annals of Internal Medicine                                     | 1996 | Effectiveness of cloxacillin with and without gentamicin in short-term therapy for right-sided Staphylococcus aureus endocarditis. A randomized, controlled trial.                                 | <i>ITT trial</i>      |
| Paul 2006a      | <b>Klastersky</b>            | Cancer                                                          | 1973 | Therapy with carbenicillin and gentamicin for patients with cancer and severe infections caused by gram-negative rods                                                                              | <i>"no ITT trial"</i> |
| Paul 2006a      | <b>Koehler</b>               | International Journal of Experimental and Clinical Chemotherapy | 1990 | Controlled clinical study of ceftazidime (3 x 1 g daily) versus piperacillin + tobramycin in patients with nosocomial pneumonia.                                                                   | <i>"no ITT trial"</i> |
| Paul 2006a      | <b>Korzeniowski</b>          | Annals of Internal Medicine                                     | 1982 | Combination antimicrobial therapy for Staphylococcus aureus endocarditis in patients addicted to parenteral drugs and in nonaddicts: A prospective study.                                          | <i>"no ITT trial"</i> |
| Paul 2006a      | <b>Sculier</b>               | Journal of Antimicrobial Chemotherapy                           | 1982 | Effectiveness of mezlocillin and endotracheally administered sisomicin with or without parenteral sisomicin in the treatment                                                                       | <i>"no ITT trial"</i> |



|            |                      |                                               |      |                                                                                                                                                                                                 |                       |
|------------|----------------------|-----------------------------------------------|------|-------------------------------------------------------------------------------------------------------------------------------------------------------------------------------------------------|-----------------------|
|            |                      |                                               |      | of Gram-negative bronchopneumonia.                                                                                                                                                              |                       |
| Paul 2006a | <b>Abrams</b>        | Annals of Internal Medicine                   | 1979 | Single or combination therapy of staphylococcal endocarditis in intravenous drug abusers.                                                                                                       | <i>"no ITT trial"</i> |
| Paul 2006a | <b>Cometta</b>       | Antimicrobial Agents and Chemotherapy         | 1994 | Prospective randomized comparison of imipenem monotherapy with imipenem plus netilmicin for treatment of severe infections in non-neutropenic patients.                                         | <i>"no ITT trial"</i> |
| Paul 2006a | <b>D'Antonio</b>     | Chemotherapy                                  | 1992 | Randomized comparison of ceftriaxone versus ceftriaxone plus amikacin for the empirical treatment of infections in patients with altered host defense: microbiological and clinical evaluation. | <i>"no ITT trial"</i> |
| Paul 2006a | <b>Duff</b>          | American Journal of Obstetrics and Gynecology | 1982 | A comparative study of two antibiotic regimens for the treatment of operative site infections.                                                                                                  | <i>"no ITT trial"</i> |
| Paul 2006b | <b>Alvarez Lerma</b> | Journal of Chemotherapy                       | 2001 | Efficacy of meropenem as monotherapy in the treatment of ventilator- associated pneumonia.                                                                                                      | <i>mITT trial</i>     |
| Paul 2006b | <b>Hoepelman*</b>    | Lancet                                        | 1988 | Comparison of once daily ceftriaxone with gentamicin plus cefuroxime for treatment of serious bacterial infections.                                                                             | <i>mITT trial</i>     |
| Paul 2006b | <b>Smith</b>         | Annals of Internal Medicine                   | 1984 | Cefotaxime compared with nafcillin plus tobramycin for serious bacterial infections. A randomized, double-blind trial.                                                                          | <i>mITT trial</i>     |
| Paul 2006b | <b>Finer</b>         | Journal of the Royal Society of Medicine      | 1992 | Ceftazidime versus aminoglycoside and (ureido)penicillin combination in the empirical treatment of serious infection.                                                                           | <i>ITT trial</i>      |
| Paul 2006b | <b>Jaspers</b>       | Antimicrobial Agents and Chemotherapy         | 1998 | Meropenem versus cefuroxime plus gentamicin for treatment of serious infections in elderly patients.                                                                                            | <i>ITT trial</i>      |
| Paul 2006b | <b>McCormick</b>     | Hepatology                                    | 1997 | A prospective randomized trial of ceftazidime versus netilmicin plus mezlocillin in the empirical therapy of presumed sepsis in cirrhotic patients.                                             | <i>ITT trial</i>      |
| Paul 2006b | <b>Rubinstein</b>    | Clinical Infectious Diseases                  | 1995 | Ceftazidime monotherapy vs. Ceftriaxone/tobramycin for serious hospital- acquired gram-negative infections.                                                                                     | <i>ITT trial</i>      |

|            |                  |                                                                   |      |                                                                                                                                                                |                       |
|------------|------------------|-------------------------------------------------------------------|------|----------------------------------------------------------------------------------------------------------------------------------------------------------------|-----------------------|
| Paul 2006b | <b>Sieger</b>    | Critical Care Medicine                                            | 1997 | Empiric treatment of hospital-acquired lower respiratory tract infections with meropenem or ceftazidime with tobramycin: a randomized study.                   | <i>ITT trial</i>      |
| Paul 2006b | <b>Speich</b>    | European Journal of Clinical Microbiology and Infectious Diseases | 1998 | Efficacy, safety, and tolerance of piperacillin/tazobactam compared to co-amoxiclav plus an aminoglycoside in the treatment of severe pneumonia.               | <i>ITT trial</i>      |
| Paul 2006b | <b>Stille</b>    | European Journal of Clinical Microbiology and Infectious Diseases | 1992 | Randomized multicenter clinical trial with imipenem/cilastatin versus cefotaxime/gentamicin in the treatment of patients with non-life-threatening infections. | <i>ITT trial</i>      |
| Paul 2006b | <b>Thompson</b>  | Surgery, gynecology & obstetrics                                  | 1990 | Broad spectrum penicillin as an adequate therapy for acute cholangitis.                                                                                        | <i>"no ITT trial"</i> |
| Paul 2006b | <b>Thompson2</b> | Surgery, gynecology & obstetrics                                  | 1993 | Cefepime for infections of the biliary tract.                                                                                                                  | <i>"no ITT trial"</i> |
| Paul 2006b | <b>Arich</b>     | Pathologie Biologie (Paris                                        | 1987 | [Comparison of the efficacy of cefotaxime alone and the combination cefazolin-tobramycin in the treatment of enterobacterial septicemia] In French.            | <i>"no ITT trial"</i> |
| Paul 2006b | <b>Bergeron</b>  | Antimicrobials Agents and Chemotherapy                            | 1988 | Cefoperazone compared with ampicillin plus tobramycin for severe biliary tract infections.                                                                     | <i>"no ITT trial"</i> |
| Paul 2006b | <b>Cone</b>      | Antimicrobial Agents and Chemotherapy                             | 1985 | Ceftazidime versus tobramycin-ticarcillin in the treatment of pneumonia and bacteremia.                                                                        | <i>"no ITT trial"</i> |
| Paul 2006b | <b>Duff</b>      | American Journal of Obstetrics and Gynecology                     | 1982 | A comparative study of two antibiotic regimens for the treatment of operative site infections.                                                                 | <i>"no ITT trial"</i> |
| Paul 2006b | <b>Felisart</b>  | Hepatology                                                        | 1985 | Cefotaxime is more effective than is ampicillin-tobramycin in cirrhotics with severe infections.                                                               | <i>"no ITT trial"</i> |
| Paul 2006b | <b>Havig</b>     | Scandinavian Journal of Gastroenterology                          | 1973 | Effect of ampicillin, chloramphenicol, and penicillin-streptomycin in acute cholecystitis.                                                                     | <i>"no ITT trial"</i> |
| Paul 2006b | <b>Koehler</b>   | International Journal of Experimental and Clinical                | 1990 | Controlled clinical study of ceftazidime (3 x 1 g daily) versus piperacillin + tobramycin in patients with nosocomial                                          | <i>"no ITT trial"</i> |

|                |                      |                        |      |                                                                                                                                                                                                        |                       |
|----------------|----------------------|------------------------|------|--------------------------------------------------------------------------------------------------------------------------------------------------------------------------------------------------------|-----------------------|
|                |                      | Chemotherapy           |      | pneumonia.                                                                                                                                                                                             |                       |
| Paul 2006b     | <b>Mouton</b>        | Presse Medicale        | 1990 | [Prospective, randomized, controlled study of imipenem-cilastatin versus cefotaxime-amikacin in the treatment of lower respiratory tract infection and septicemia at intensive care units], in French. | <i>“no ITT trial”</i> |
| Rahimi 2007    | <b>Targan</b>        | Nejm                   | 1997 | A short-term study of chimeric monoclonal antibody cA2 to tumor necrosis factor alpha for Crohn's disease.                                                                                             | <i>mITT trial</i>     |
| Rahimi 2007    | <b>Winter</b>        | Aliment Pharmacol Ther | 2004 | Intravenous CDP870, a PEGylated Fab' fragment of a humanized antitumour necrosis factor antibody, in patients with moderate-to-severe Crohn's disease: an exploratory study                            | <i>mITT trial</i>     |
| Rahimi 2007    | <b>Schreiber</b>     | Gastroenterology       | 2005 | CDP870 Crohn's Disease Study Group. A randomized, placebo-controlled trial of certolizumab pegol (CDP870) for treatment of Crohn's disease                                                             | <i>mITT trial</i>     |
| Rahimi 2007    | <b>Sandborn2001a</b> | Gastroenterology       | 2001 | Etanercept for active Crohn's disease: a randomized, double-blind, placebo-controlled trial                                                                                                            | <i>mITT trial</i>     |
| Rahimi 2007    | <b>Sandborn2001b</b> | Gastroenterology       | 2001 | An engineered human antibody to TNF (CDP571) for active Crohn's disease: a randomized double-blind placebo-controlled trial                                                                            | <i>mITT trial</i>     |
| Rahimi 2007    | <b>Sandborn2004</b>  | Gut                    | 2004 | CDP571, a humanised monoclonal antibody to tumour necrosis factor alpha, for moderate to severe Crohn's disease: a randomised, double blind, placebo controlled trial                                  | <i>mITT trial</i>     |
| Rahimi 2007    | <b>Rutgeerts*</b>    | Gastroenterology       | 1999 | Efficacy and Safety of Retreatment With Anti-Tumor Necrosis Factor Antibody (Infliximab) to Maintain Remission in Crohn's Disease                                                                      | <i>ITT trial</i>      |
| Ravindran 2008 | <b>Fraser</b>        | Ann Rheum dis          | 2005 | A randomized, double blind, placebo controlled multicentre trial of combination therapy with methotrexate plus cyclosporin in patients with active psoriatic arthritis                                 | <i>mITT trial</i>     |

|                |                     |                 |      |                                                                                                                                                                                                         |                       |
|----------------|---------------------|-----------------|------|---------------------------------------------------------------------------------------------------------------------------------------------------------------------------------------------------------|-----------------------|
| Ravindran 2008 | <b>Combe</b>        | Br J Rheumatol  | 1996 | Sulfasalazine in psoriatic arthritis: a randomized, multicentre, placebo-controlled study                                                                                                               | <i>mITT trial</i>     |
| Ravindran 2008 | <b>Kaltwasser</b>   | Arthritis Rheum | 2004 | Efficacy and safety of leflunomide in the treatment of psoriatic arthritis and psoriasis.                                                                                                               | <i>mITT trial</i>     |
| Ravindran 2008 | <b>Mease 2004</b>   | Arthritis Rheum | 2004 | Etanercept treatment of psoriatic arthritis: safety, efficacy, and effect on disease progression                                                                                                        | <i>mITT trial</i>     |
| Ravindran 2008 | <b>Mease 2005</b>   | Arthritis Rheum | 2005 | Adalimumab for the treatment of patients with moderately to severely active psoriatic arthritis: results of a double blind, randomized, placebo-controlled trial                                        | <i>mITT trial</i>     |
| Ravindran 2008 | <b>Mease 2006</b>   | arthritis Rheum | 2006 | Alefacept in combination with methotrexate for the treatment of psoriatic arthritis: result of a randomized, double blind, placebo-controlled study                                                     | <i>mITT trial</i>     |
| Ravindran 2008 | <b>Clegg</b>        | Arthritis Rheum | 1996 | Comparison of sulfasalazine and placebo in the treatment of psoriatic arthritis: a Department of Veterans Affairs Cooperative Study                                                                     | <i>ITT trial</i>      |
| Ravindran 2008 | <b>Antoni 2005a</b> | Ann Rheum dis   | 2005 | Sustained benefits of infliximab therapy for dermatologic and articular manifestations of psoriatic arthritis: results from the Infliximab Multinational Psoriatic Arthritis Controlled Trial (IMPACT). | <i>ITT trial</i>      |
| Ravindran 2008 | <b>Antoni 2005b</b> | Ann Rheum Dis   | 2005 | Infliximab improves signs and symptoms of psoriatic arthritis: results of the IMPACT 2 trial                                                                                                            | <i>ITT trial</i>      |
| Ravindran 2008 | <b>Willkens</b>     | Arthritis Rheum | 1984 | Randomized, double-blind, placebo controlled trial of low-dose pulse methotrexate in psoriatic arthritis                                                                                                | <i>"no ITT trial"</i> |
| Ravindran 2008 | <b>Fraser</b>       | Br J Rheumatol  | 1993 | Sulfasalazine in the management of psoriatic arthritis                                                                                                                                                  | <i>"no ITT trial"</i> |
| Ravindran 2008 | <b>Gupta</b>        | J Rheumatol     | 2005 | Sulfasalazine therapy for psoriatic arthritis: a double blind, placebo controlled trial                                                                                                                 | <i>"no ITT trial"</i> |
| Ravindran 2008 | <b>Farr</b>         | Br J Rheumatol  | 1990 | Sulfasalazine in psoriatic arthritis: a double-blind placebo-controlled study.                                                                                                                          | <i>"no ITT trial"</i> |

|                |                                   |                                                                                        |      |                                                                                                                                                                                      |                       |
|----------------|-----------------------------------|----------------------------------------------------------------------------------------|------|--------------------------------------------------------------------------------------------------------------------------------------------------------------------------------------|-----------------------|
| Ravindran 2008 | <b>Carrette</b>                   | Arthritis Rheum                                                                        | 1989 | Evaluation of auranofin in psoriatic arthritis: a double blind placebo controlled trial                                                                                              | <i>"no ITT trial"</i> |
| Ravindran 2008 | <b>Palit</b>                      | Br J Rheumatol                                                                         | 1990 | A multicentre double-blind comparison of auranofin, intramuscular gold thiomalate and placebo in patients with psoriatic arthritis.                                                  | <i>"no ITT trial"</i> |
| Ravindran 2008 | <b>Palit</b>                      | Br J Rheumatol                                                                         | 1990 | A multicentre double-blind comparison of auranofin, intramuscular gold thiomalate and placebo in patients with psoriatic arthritis.                                                  | <i>"no ITT trial"</i> |
| Ravindran 2008 | <b>Price</b>                      | Br J Rheumatol                                                                         | 1986 | d-Penicillamine and psoriatic arthropathy                                                                                                                                            | <i>"no ITT trial"</i> |
| Ravindran 2008 | <b>Mease</b>                      | Lancet                                                                                 | 2000 | Etanercept in the treatment of psoriatic arthritis and psoriasis: a randomised trial.                                                                                                | <i>"no ITT trial"</i> |
| Rendell 2006   | <b>Vieta</b>                      | American College of Neuropsychopharmacology 41st Annual Meeting, San Juan, Puerto Rico | 2002 | Risperidone in the treatment of manic or mixed episodes of bipolar disorders.                                                                                                        | <i>mITT trial</i>     |
| Rendell 2006   | <b>Smulevich</b>                  | Neuropsychopharmacology                                                                | 2005 | Acute and continuation risperidone monotherapy in bipolar mania: a 3-week placebo-controlled trial followed by a 9-week double-blind trial of risperidone and haloperidol. European. | <i>mITT trial</i>     |
| Rendell 2006   | <b>Yatham</b>                     | British Journal of Psychiatry                                                          | 2002 | Mood stabilisers plus risperidone or placebo in the treatment of acute mania.                                                                                                        | <i>"no ITT trial"</i> |
| Rendell 2006   | <b>Hirschfeld RIS-INT-69 2004</b> | American Journal of Psychiatry                                                         | 2004 | Rapid antimanic effect of risperidone monotherapy: 3-week multicenter, double-blind, placebo-controlled trial.                                                                       | <i>"no ITT trial"</i> |
| Rhorer 2009    | <b>Tam</b>                        | Pediatr Infect Dis J                                                                   | 2007 | Efficacy and safety of a live attenuated, cold-adapted influenza vaccine, trivalent against culture-confirmed influenza in young children in Asia                                    | <i>mITT trial</i>     |
| Rhorer 2009    | <b>Vesikari</b>                   | Pediatrics                                                                             | 2006 | Safety, efficacy, and effectiveness of cold-adapted influenza vaccine-trivalent against community-acquired, culture-confirmed influenza in young children attending day care         | <i>mITT trial</i>     |

|              |                    |                                                                                                                |      |                                                                                                                                                                                               |                       |
|--------------|--------------------|----------------------------------------------------------------------------------------------------------------|------|-----------------------------------------------------------------------------------------------------------------------------------------------------------------------------------------------|-----------------------|
| Rhorer 2009  | <b>Bracco</b>      | Pediatr Infect Dis J                                                                                           | 2009 | Efficacy and safety of one and two doses of live attenuated influenza vaccine in vaccine-naive children.                                                                                      | <i>mITT trial</i>     |
| Rhorer 2009  | <b>Lum</b>         | 26th Annual Meeting of the European Society for Paediatric Infectious Diseases; 2008 May 13–16; Graz, Austria. | 2008 | Safety, efficacy, and immunogenicity of live attenuated influenza vaccine concurrently administered with a combination of mumps, measles, and rubella vaccine.                                | <i>mITT trial</i>     |
| Rhorer 2009  | <b>Ashkenazi</b>   | Pediatr Inf Dis J                                                                                              | 2006 | Superior relative efficacy of live attenuated influenza vaccine compared with inactivated influenza vaccine in young children with recurrent respiratory tract infections.                    | <i>mITT trial</i>     |
| Rhorer 2009  | <b>Fleming</b>     | Pediatr Infect Dis J                                                                                           | 2006 | Comparison of the efficacy and safety of live attenuated cold-adapted influenza vaccine, trivalent with trivalent inactivated influenza virus vaccine in children and adolescents with asthma | <i>mITT trial</i>     |
| Rhorer 2009  | <b>Belshe 2007</b> | N Engl J Med                                                                                                   | 2007 | Live attenuated versus inactivated influenza vaccine in infants and young children                                                                                                            | <i>mITT trial</i>     |
| Rhorer 2009  | <b>Belshe 1998</b> | N Engl J Med                                                                                                   | 1998 | The efficacy of live attenuated, cold-adapted, trivalent, intranasal influenza virus vaccine in children                                                                                      | <i>“no ITT trial”</i> |
| Rhorer 2009  | <b>Belshe 2000</b> | J Pediatr                                                                                                      | 2000 | Efficacy of vaccination with live attenuated, cold-adapted, trivalent, intranasal influenza virus vaccine against a variant (A/Sydney) not contained in the vaccine                           | <i>“no ITT trial”</i> |
| Rhorer 2009  | <b>Forrest</b>     | Clin Vaccine Immunol                                                                                           | 2008 | Correlation of cellular immune responses with protection against culture-confirmed influenza in young children                                                                                | <i>“no ITT trial”</i> |
| Rodrigo 2007 | <b>Maltais</b>     | Chest                                                                                                          | 2005 | Improvements in symptom-limited exercise performance over 8 h with once-daily tiotropium in patients with COPD                                                                                | <i>mITT trial</i>     |
| Rodrigo 2007 | <b>Niewoehner</b>  | Ann Intern Med                                                                                                 | 2005 | Prevention of exacerbations of chronic obstructive pulmonary disease with tiotropium, a once-daily inhaled anticholinergic bronchodilator—a randomized trial                                  | <i>mITT trial</i>     |

|                |                       |                           |      |                                                                                                                                             |                       |
|----------------|-----------------------|---------------------------|------|---------------------------------------------------------------------------------------------------------------------------------------------|-----------------------|
| Rodrigo 2007   | <b>O'Donnell</b>      | Eur Respir J              | 2004 | Effects of tiotropium on lung hyperinflation, dyspnea and exercise tolerance in COPD                                                        | <i>mITT trial</i>     |
| Rodrigo 2007   | <b>Casaburi 2002</b>  | Eur Respir J              | 2002 | A long-term evaluation of once-daily inhaled tiotropium in chronic obstructive pulmonary disease                                            | <i>ITT trial</i>      |
| Rodrigo 2007   | <b>Littner</b>        | Am J Respir Crit Care Med | 2000 | long-acting bronchodilation with once-daily dosing of tiotropium (Spiriva) in stable chronic obstructive pulmonary disease                  | <i>"no ITT trial"</i> |
| Rodrigo 2007   | <b>Calverley</b>      | Thorax                    | 2003 | Effect of tiotropium bromide on circadian variation in airflow limitation in chronic obstructive pulmonary disease                          | <i>"no ITT trial"</i> |
| Rodrigo 2007   | <b>Brusasco</b>       | Thorax                    | 2003 | Health outcomes following treatment for six months with once daily tiotropium compared with twice daily salmeterol in patients with COPD    | <i>"no ITT trial"</i> |
| Rodrigo 2007   | <b>Celli</b>          | Chest                     | 2004 | Improvement in resting inspiratory capacity and hyperinflation with tiotropium in COPD patients with increased static lung volumes          | <i>"no ITT trial"</i> |
| Roskell 2010   | <b>Mease</b>          | J Rheumatol               | 2009 | The efficacy and safety of milnacipran for treatment of fibromyalgia. A randomized, double-blind, placebo-controlled trial                  | <i>mITT trial</i>     |
| Roskell 2010   | <b>Gendreau</b>       | J Rheumatol               | 2005 | Efficacy of milnacipran in patients with fibromyalgia                                                                                       | <i>ITT trial</i>      |
| Schneider 2007 | <b>DeDeyn 1999</b>    | Neurology                 | 1999 | A randomized trial of risperidone, placebo, and haloperidol for behavioral symptoms of dementia.                                            | <i>mITT trial</i>     |
| Schneider 2007 | <b>Katz</b>           | J Clin Psychiatry         | 1999 | Comparison of risperidone and placebo for psychosis and behavioral disturbances associated with dementia: a randomized, double-blind trial. | <i>mITT trial</i>     |
| Schneider 2007 | <b>Brodaty</b>        | J Clin Psychiatry         | 2003 | A randomized placebocontrolled trial of risperidone for the treatment of aggression, agitation, and psychosis of dementia.                  | <i>ITT trial</i>      |
| Seo 2009       | <b>Smith (IMPACT)</b> | J Clin Oncol              | 2005 | Neoadjuvant treatment of postmenopausal breast cancer with anastrozole, tamoxifen, or both in combination: the immediate                    | <i>ITT trial</i>      |

|                |                                   |                           |      |                                                                                                                                                                                                             |                       |
|----------------|-----------------------------------|---------------------------|------|-------------------------------------------------------------------------------------------------------------------------------------------------------------------------------------------------------------|-----------------------|
|                |                                   |                           |      | preoperative anastrozole, tamoxifen, or combined with tamoxifen (IMPACT) multicenter double-blind randomized trial.                                                                                         |                       |
| Seo 2009       | <b>Eiermann (P024)</b>            | Ann Oncol                 | 2001 | Preoperative treatment of postmenopausal breast cancer patients with letrozole: a randomized double-blind multicenter study.                                                                                | <i>mITT trial</i>     |
| Seo 2009       | <b>Cataliotti (PROACT)</b>        | Cancer                    | 2006 | Comparison of anastrozole versus tamoxifen as preoperative therapy in postmenopausal women with hormone receptor-positive breast cancer: the pre-operative "Arimidex" compared to tamoxifen (PROACT) trial. | <i>ITT trial</i>      |
| Siler 2010     | <b>Arnold 2008</b>                | J Pain                    | 2008 | A 14-week, randomized, double-blinded, placebo-controlled monotherapy trial of pregabalin in patients with fibromyalgia                                                                                     | <i>mITT trial</i>     |
| Siler 2010     | <b>Crofford 2005</b>              | Arthritis Rheum           | 2005 | Pregabalin for the treatment of fibromyalgia syndrome: Results of a randomized, double-blind, placebo-controlled trial                                                                                      | <i>mITT trial</i>     |
| Siler 2010     | <b>Pfizer Protocol # A0081100</b> |                           | 2007 | A 14 Week, Randomized, Double-Blind, Placebo-Controlled Trial Of Pregabalin Twice Daily In Patients With Fibromyalgia.                                                                                      | <i>mITT trial</i>     |
| Siler 2010     | <b>Mease</b>                      | Journal Rheumatol         | 2008 | A randomized, double-blind, placebo-controlled, phase III trial of pregabalin in the treatment of patients with fibromyalgia                                                                                | <i>ITT trial</i>      |
| Sjalander 2008 | <b>Leizorovics</b>                | Circulation               | 2004 | Randomized, placebo-controlled trial of Dalteparin for the prevention of venous thromboembolism in acutely ill medical patients                                                                             | <i>mITT trial</i>     |
| Sjalander 2008 | <b>Fraisse</b>                    | Am J Respir Crit Care Med | 2000 | Nadroparin in the prevention of deep vein thrombosis in acute decompensated COPD                                                                                                                            | <i>mITT trial</i>     |
| Sjalander 2008 | <b>Samama</b>                     | N Engl J Med              | 1999 | A comparison of enoxaparin with placebo for the prevention of venous thromboembolism in acutely ill medical patients                                                                                        | <i>ITT trial</i>      |
| Sjalander 2008 | <b>Lederle</b>                    | Am J Med                  | 2006 | The prophylaxis of medical patients for thromboembolism pilot study                                                                                                                                         | <i>ITT trial</i>      |
| Sjalander 2008 | <b>Cohen</b>                      | BMJ                       | 2006 | Efficacy and safety of fondaparinux for the prevention of venous thromboembolism in older acute medical patients:                                                                                           | <i>"no ITT trial"</i> |



|                   |                  |                         |      |                                                                                                                                                             |                       |
|-------------------|------------------|-------------------------|------|-------------------------------------------------------------------------------------------------------------------------------------------------------------|-----------------------|
|                   |                  |                         |      | randomised placebo controlled trial                                                                                                                         |                       |
| Sjalander 2008    | <b>Dahan</b>     | Haemostasis             | 1986 | Prevention of deep vein thrombosis in elderly medical in-patients by a low molecular weight heparin: a randomized double-blind trial                        | <i>"no ITT trial"</i> |
| Van de Broek 2009 | <b>Benkert</b>   | J Psychiatr Res         | 1996 | A randomized, double-blind comparison of a rapidly escalating dose of venlafaxine and imipramine in inpatients with major depression and melancholia.       | <i>mITT trial</i>     |
| Van de Broek 2009 | <b>Lecrubier</b> | Acta Psychiatr Scand    | 1997 | Efficacy of venlafaxine in depressive illness in general practice.                                                                                          | <i>mITT trial</i>     |
| Van de Broek 2009 | <b>Samuelian</b> | J Psychopharmacol       | 1998 | A randomized, double-blind, parallel-group comparison of venlafaxine and clomipramine in outpatients with major depression.                                 | <i>mITT trial</i>     |
| Van de Broek 2009 | <b>Gentil</b>    | J Psychopharmacol       | 2000 | Double-blind comparison of venlafaxine and amitriptyline in outpatients with major depression with or without melancholia.                                  | <i>mITT trial</i>     |
| Van de Broek 2009 | <b>Schweizer</b> | J Clin Psychiatry       | 1994 | Comparison of venlafaxine and imipramine in the acute treatment of major depression in outpatients                                                          | <i>mITT trial</i>     |
| Van de Broek 2009 | <b>Sauer</b>     | Pharmacopsychiatry      | 2003 | Efficacy and safety of venlafaxine ER vs. amitriptyline ER in patients with major depression of moderate severity.                                          | <i>ITT trial</i>      |
| Van de Broek 2009 | <b>Smeraldi</b>  | Primary Care Psychiatry | 1998 | Double-blind, randomized study of venlafaxine, clomipramine and trazodone in geriatric patients with major depression.                                      | <i>ITT trial</i>      |
| Wang 2010 (a)     | <b>Neuhaus</b>   | Liver Transp            | 2002 | Improved treatment response with basiliximab immunoprophylaxis after liver transplantation: results from a double-blind randomized placebo-controlled trial | <i>mITT trial</i>     |
| Wang 2010 (a)     | <b>Lupo</b>      | Transplantation         | 2008 | Basiliximab Versus Steroids in Double Therapy Immunosuppression in Liver Transplantation: A Prospective Randomized Clinical Trial                           | <i>ITT trial</i>      |
| Wang 2010 (a)     | <b>Schmeding</b> | Ann Transplant          | 2007 | Influence of basiliximab induction therapy on long term outcome after liver transplantation, a prospectively                                                | <i>"no ITT trial"</i> |

|               |                  |                          |      |                                                                                                                                                                                                                                                                        |                       |
|---------------|------------------|--------------------------|------|------------------------------------------------------------------------------------------------------------------------------------------------------------------------------------------------------------------------------------------------------------------------|-----------------------|
|               |                  |                          |      | randomised trial                                                                                                                                                                                                                                                       |                       |
| Wang 2010 (b) | <b>Otero</b>     | Liver Transpl            | 2009 | A prospective randomized open study in liver transplant recipients: daclizumab, mycophenolate mofetil, and tacrolimus versus tacrolimus and steroids                                                                                                                   | <i>mITT trial</i>     |
| Wang 2010 (b) | <b>Boillot</b>   | Liver Transp             | 2005 | Corticosteroid-free immunosuppression with tacrolimus following induction with daclizumab: a large randomized clinical study                                                                                                                                           | <i>mITT trial</i>     |
| Wang 2010 (b) | <b>Neuberger</b> | Am J Transplant          | 2009 | Delayed introduction of reduced-dose tacrolimus, and renal function in liver transplantation: the "RESPECT" study                                                                                                                                                      | <i>mITT trial</i>     |
| Wang 2010 (b) | <b>Kato</b>      | Transplantation          | 2007 | Randomized trial of steroid-free induction versus corticosteroid maintenance among orthotopic liver transplant recipients with hepatitis C virus: impact on hepatic fibrosis progression at one year                                                                   | <i>ITT trial</i>      |
| Wang 2010 (b) | <b>Klintmalm</b> | Liver Transpl            | 2007 | Corticosteroid-free immunosuppression with daclizumab in HCV(+) liver transplant recipients: 1-year interim results of the HCV-3 study                                                                                                                                 | <i>ITT trial</i>      |
| Wang 2010 (b) | <b>Washburn</b>  | Transplantation          | 2001 | Steroid elimination 24 hours after liver transplantation using daclizumab, tacrolimus, and mycophenolate mofetil                                                                                                                                                       | <i>"no ITT trial"</i> |
| Wang 2010 (b) | <b>Yoshida</b>   | Liver Transp             | 2005 | Evaluation of renal function in liver transplant recipients receiving daclizumab (Zenapax), mycophenolate mofetil, and a delayed, low-dose tacrolimus regimen vs a standard-dose tacrolimus and mycophenolate mofetil regimen: a multicenter randomized clinical trial | <i>"no ITT trial"</i> |
| Wang 2010 (b) | <b>Becker</b>    | Transplantation          | 2008 | Patient outcomes in two steroid-free regimens using tacrolimus monotherapy after daclizumab induction and tacrolimus with mycophenolate mofetil in liver transplantation                                                                                               | <i>mITT trial</i>     |
| Weinmann 2008 | <b>Allard</b>    | Int J Geriatr Psychiatry | 2004 | Efficacy and tolerability of venlafaxine in geriatric outpatients with major depression: a double-blind, randomised 6-month comparative trial with citalopram                                                                                                          | <i>mITT trial</i>     |

|               |                              |                                       |      |                                                                                                                                                                          |                   |
|---------------|------------------------------|---------------------------------------|------|--------------------------------------------------------------------------------------------------------------------------------------------------------------------------|-------------------|
| Weinmann 2008 | <b>Bielski</b>               | Psychopharmacology                    | 2004 | A double-blind comparison of escitalopram and venlafaxine extended release in the treatment of major depressive disorder                                                 | <i>mITT trial</i> |
| Weinmann 2008 | <b>Montgomery</b>            | Neuropsychobiology                    | 2004 | A randomised study comparing escitalopram with venlafaxine XR in primary care patients with major depressive disorder                                                    | <i>mITT trial</i> |
| Weinmann 2008 | <b>Meh-tonen</b>             | J Clin Psychiatry                     | 2000 | Randomized, double-blind comparison of venlafaxine and sertraline in outpatients with major depressive disorder                                                          | <i>mITT trial</i> |
| Weinmann 2008 | <b>Nemeroff</b>              | J Psychiatr res                       | 2007 | double-blind, placebo-controlled comparison of venlafaxine and fluoxetine treatment in depressed outpatients                                                             | <i>mITT trial</i> |
| Weinmann 2008 | <b>Rudolph</b>               | Journal of Affective Disorders        | 1999 | A randomized, placebo-controlled, dose–response trial of venlafaxine hydrochloride in the treatment of major depression                                                  | <i>mITT trial</i> |
| Weinmann 2008 | <b>Shatzberg</b>             | Am J Geriatr Psychiatry               | 2006 | A double-blind, placebo-controlled study of venlafaxine and fluoxetine in geriatric outpatients with major depression                                                    | <i>mITT trial</i> |
| Weinmann 2008 | <b>Silverston</b>            | The Journal of clinical psychiatry    | 1999 | Once-daily venlafaxine extended release (XR) compared with fluoxetine in outpatients with depression and anxiety                                                         | <i>mITT trial</i> |
| Weinmann 2008 | <b>Sir</b>                   | The Journal of clinical psychiatry    | 2005 | Randomized trial of sertraline versus venlafaxine XR in major depression: efficacy and discontinuation symptoms                                                          | <i>mITT trial</i> |
| Weinmann 2008 | <b>Tylee</b>                 | Prim Care Companion J Clin Psychiatry | 1997 | A double-blind, randomized, 12-week comparison study of the safety and efficacy of venlafaxine and fluoxetine in moderate to severe major depression in general practice | <i>mITT trial</i> |
| Weinmann 2008 | <b>Shelton</b>               | J Clin Psychiatry                     | 2006 | Randomized, double-blind, active-control study of sertraline versus venlafaxine XR in major depressive disorder                                                          | <i>mITT trial</i> |
| Weinmann 2008 | <b>Tzanakaki et al. 2000</b> | Int Clin Psychopharmacol              | 2000 | Increased remission rates with venlafaxine compared with fluoxetine in hospitalized patients with major depression and melancholia                                       | <i>ITT trial</i>  |
| Weinmann 2008 | <b>Costa e Silva 1998</b>    | J Clin Psychiatry                     | 1998 | Randomized, double-blind comparison of venlafaxine and fluoxetine in outpatients with major depression                                                                   | <i>ITT trial</i>  |

|               |                      |                               |      |                                                                                                                                                                                                                                                                                                                      |                   |
|---------------|----------------------|-------------------------------|------|----------------------------------------------------------------------------------------------------------------------------------------------------------------------------------------------------------------------------------------------------------------------------------------------------------------------|-------------------|
| Weinmann 2008 | <b>Alves</b>         | Primary Care Psychiatry       | 1999 | Efficacy and tolerability of venlafaxine and fluoxetine in outpatients with major depression                                                                                                                                                                                                                         | <i>ITT trial</i>  |
| Weinmann 2008 | <b>Mc Partlin</b>    | Companionon J Clin Psychiatry | 1998 | A comparison of once-daily venlafaxine XR and paroxetine in depressed outpatients treated in general practice                                                                                                                                                                                                        | <i>mITT trial</i> |
| Xu 2010       | <b>Albain</b>        | J Clin Oncol                  | 2008 | Gemcitabine plus Paclitaxel versus Paclitaxel monotherapy in patients with metastatic breast cancer and prior anthracycline treatment.                                                                                                                                                                               | <i>ITT trial</i>  |
| Xu 2010       | <b>O'Shaughnessy</b> | J Clin Oncol                  | 2002 | Superior survival with capecitabine plus docetaxel combination therapy in anthracycline-pretreated patients with advanced breast cancer: phase III trial results.                                                                                                                                                    | <i>ITT trial</i>  |
| Xu 2010       | <b>Sparano</b>       | J Clin Oncol                  | 2009 | Pegylated liposomal doxorubicin plus docetaxel significantly improves time to progression without additive cardiotoxicity compared with docetaxel monotherapy in patients with advanced breast cancer previously treated with neoadjuvant-adjuvant anthracycline therapy: results from a randomized phase III study. | <i>ITT trial</i>  |
| Xu 2010       | <b>Fountzilas</b>    | Breast Cancer Res Treat       | 2009 | A randomized phase III study comparing three anthracycline-free taxane-based regimens, as first line chemotherapy, in metastatic breast cancer: a Hellenic Cooperative Oncology Group study.                                                                                                                         | <i>mITT trial</i> |
| Ziakas 2010   | <b>Penack</b>        | Ann Oncol                     | 2006 | Low-dose liposomal amphotericin B in the prevention of invasive fungal infections in patients with prolonged neutropenia: Results from a randomized, single-center trial                                                                                                                                             | <i>mITT trial</i> |
| Ziakas 2010   | <b>Rotstein</b>      | Clin Infect Dis               | 1999 | Randomized placebo-controlled trial of fluconazole prophylaxis for neutropenic cancer patients: Benefit based on purpose and intensity of cytotoxic therapy                                                                                                                                                          | <i>mITT trial</i> |
| Ziakas 2010   | <b>Slavin</b>        | J Infect Dis                  | 1995 | Efficacy and safety of fluconazole prophylaxis for fungal infections after marrow transplantation—a prospective, randomized, double-blind study                                                                                                                                                                      | <i>mITT trial</i> |

|             |                     |                        |      |                                                                                                                                                                                                                          |                       |
|-------------|---------------------|------------------------|------|--------------------------------------------------------------------------------------------------------------------------------------------------------------------------------------------------------------------------|-----------------------|
| Ziakas 2010 | <b>Kelsey</b>       | Bone Marrow Transplant | 1999 | Liposomal amphotericin (AmBisome) in the prophylaxis of fungal infections in neutropenic patients: A randomised, double-blind, placebo-controlled study                                                                  | <i>mITT trial</i>     |
| Ziakas 2010 | <b>Goodman</b>      | nejm                   | 1992 | A controlled trial of fluconazole to prevent fungal infections in patients undergoing bone marrow transplantation                                                                                                        | <i>mITT trial</i>     |
| Ziakas 2010 | <b>Schaffner</b>    | J Infect Dis           | 1995 | Effect of prophylactic fluconazole on the frequency of fungal infections, amphotericin B use, and health care costs in patients undergoing intensive chemotherapy for hematologic neoplasias                             | <i>ITT trial</i>      |
| Ziakas 2010 | <b>Menichetti</b>   | Clin Infect Dis        | 1999 | Itraconazole oral solution as prophylaxis for fungal infections in neutropenic patients with hematologic malignancies: A randomized, placebo-controlled, double-blind, multicenter trial<br>GIMEMA Infection Program     | <i>ITT trial</i>      |
| Ziakas 2010 | <b>Winston</b>      | Ann Intern Med         | 1993 | Fluconazole prophylaxis of fungal infections in patients with acute leukemia<br>Results of a randomized placebo-controlled, double-blind, multicenter trial                                                              | <i>mITT trial</i>     |
| Ziakas 2010 | <b>Tollemer</b>     | Bone Marrow Transplant | 1993 | Randomized double-blind study of liposomal amphotericin B (Ambisome) prophylaxis of invasive fungal infections in bone marrow transplant recipients                                                                      | <i>"no ITT trial"</i> |
| Ziakas 2010 | <b>Chandrasekar</b> | J Antimicrob Chemother | 1994 | The effect of fluconazole prophylaxis on fungal colonization in neutropenic cancer patients                                                                                                                              | <i>"no ITT trial"</i> |
| Ziakas 2010 | <b>Riley</b>        | Am J Med               | 1994 | The prophylactic use of low-dose amphotericin B in bone marrow transplant patients                                                                                                                                       | <i>"no ITT trial"</i> |
| Ziakas 2010 | <b>Kern</b>         | Cancer                 | 1998 | Failure of fluconazole prophylaxis to reduce mortality or the requirement of systemic amphotericin B therapy during treatment for refractory acute myeloid leukemia: Results of a prospective randomized phase III study | <i>"no ITT trial"</i> |
| Ziakas 2010 | <b>Nucci</b>        | Clin Infect Dis        | 2000 | A double-blind, randomized, placebo-controlled trial of itraconazole capsules as antifungal prophylaxis for                                                                                                              | <i>"no ITT trial"</i> |

|             |                   |                        |      |                                                                                                                                                                                      |                       |
|-------------|-------------------|------------------------|------|--------------------------------------------------------------------------------------------------------------------------------------------------------------------------------------|-----------------------|
|             |                   |                        |      | neutropenic patients Clin Infect Dis                                                                                                                                                 |                       |
| Ziakas 2010 | <b>Laverdière</b> | J Antimicrob Chemother | 2000 | Impact of fluconazole prophylaxis on fungal colonization and infection rates in neutropenic patientsThe Canadian Fluconazole Study                                                   | <i>"no ITT trial"</i> |
| Ziakas 2010 | <b>Kaptan</b>     | J Infect Chemother     | 2003 | Itraconazole is not effective for the prophylaxis of fungal infections in patients with neutropenia                                                                                  | <i>"no ITT trial"</i> |
| Ziakas 2010 | <b>Brincker</b>   | Mykosen                | 1983 | Prevention of mycosis in granulocytopenic patients with prophylactic ketoconazole treatment                                                                                          | <i>"no ITT trial"</i> |
| Ziakas 2010 | <b>Estey</b>      | Arch Intern Med        | 1984 | infection prophylaxis in acute leukemiaComparative effectiveness of sulfamethoxazole and trimethoprim, ketoconazole, and a combination of the two                                    | <i>"no ITT trial"</i> |
| Ziakas 2010 | <b>Hansen</b>     | Arch Intern Med        | 1987 | Ketoconazole in the prevention of candidiasis in patients with cancerA prospective, randomized, controlled, double-blind study                                                       | <i>"no ITT trial"</i> |
| Ziakas 2010 | <b>Wingard</b>    | Am J Med               | 1987 | Prevention of fungal sepsis in patients with prolonged neutropenia: A randomized, double-blind, placebo-controlled trial of intravenous miconazole                                   | <i>"no ITT trial"</i> |
| Ziakas 2010 | <b>Benhamou</b>   | Bone Marrow Transplant | 1991 | Does ketoconazole prevent fungal infection in children treated with high dose chemotherapy and bone marrow transplantation?Results of a randomized placebo-controlled trial          | <i>"no ITT trial"</i> |
| Ziakas 2010 | <b>Palmblad</b>   | J Intern Med           | 1992 | Oral ketoconazole prophylaxis for Candida infections during induction therapy for acute leukaemia in adults: More bacteraemias                                                       | <i>"no ITT trial"</i> |
| Ziakas 2010 | <b>Perfect</b>    | J Infect Dis           | 1992 | Prophylactic intravenous amphotericin B in neutropenic autologous bone marrow transplant recipients                                                                                  | <i>"no ITT trial"</i> |
| Zou A 2009  | <b>Chen</b>       | Int J Clin Pract       | 2004 | Comparison of the efficacy and tolerability of telmisartan 40mg vs. enalapril 10mg in the treatment of mild-to-moderate hypertension: a multicentre, double-blind study in Taiwanese | <i>mITT trial</i>     |

|            |                    |                                           |      |                                                                                                                                                                                     |                       |
|------------|--------------------|-------------------------------------------|------|-------------------------------------------------------------------------------------------------------------------------------------------------------------------------------------|-----------------------|
|            |                    |                                           |      | patients.                                                                                                                                                                           |                       |
| Zou A 2009 | <b>Amerena</b>     | J Int Med Res                             | 2002 | ABPM comparison of the antihypertensive profiles of telmisartan and enalapril in patients with mild-to-moderate essential hypertension.                                             | <i>mITT trial</i>     |
| Zou A 2009 | <b>Hannedouche</b> | J Renin Angiotensin Aldosterone Syst 2001 | 2001 | Evaluation of the safety and efficacy of telmisartan and enalapril, with the potential addition of frusemide, in moderaterenal failure patients with mild-to-moderate hypertension. | <i>mITT trial</i>     |
| Zou A 2009 | <b>Karlberg</b>    | J Hypertens                               | 1999 | Efficacy and safety of telmisartan, a selective AT1 receptor antagonist, compared with enalapril in elderly patients with primary hypertension. TEES Study Group.                   | <i>mITT trial</i>     |
| Zou A 2009 | <b>Smith</b>       | Adv ther                                  | 1998 | Once-daily telmisartan compared with enalapril in the treatment of hypertension.                                                                                                    | <i>ITT trial</i>      |
| Zou A 2009 | <b>Neutel</b>      | Int J Clin Pract                          | 1999 | The efficacy and safety of telmisartan compared to enalapril in patients with severe hypertension                                                                                   | <i>"no ITT trial"</i> |
| Zou A 2009 | <b>Alcocer</b>     | Int J Clin Pract Suppl                    | 2004 | Clinical efficacy and safety of telmisartan 80mg once daily compared with enalapril 20mg once daily in patients with mild-to-moderate hypertension: results of a multicentre study. | <i>"no ITT trial"</i> |
| Zou B 2009 | <b>Lacourciere</b> | Am J Hypertens                            | 2006 | A multicenter, 14-week study of telmisartan and ramipril in patients with mild-to-moderate hypertension using ambulatory blood pressure monitoring.                                 | <i>"no ITT trial"</i> |
| Zou B 2009 | <b>Williams</b>    | J Hypertens                               | 2006 | The prospective, randomized investigation of the safety and efficacy of telmisartan versus ramipril using ambulatory blood pressure monitoring (PRISMA I).                          | <i>mITT trial</i>     |
