# Supplementary material
Source: PubMed Central journal article supplement (PMC4794029)
Supplement: abri021963.ww2_default.pdf [file abri021963.ww2_default.pdf]

**Appendix 2.** Table. Definitions Used for Assessing Risk of Bias Items in Individual Randomized Trials

| <b>Risk of bias item</b>                               | <b>Risk of bias judgment</b> | <b>Definition</b>                                                                                                                                                      |
|--------------------------------------------------------|------------------------------|------------------------------------------------------------------------------------------------------------------------------------------------------------------------|
| <b>Sequence generation</b>                             | <i>Low</i>                   | Central randomization<br>Computer random-number generator<br>Minimization<br>Random number table<br>Coin tossing, shuffling cards or envelopes                         |
|                                                        | <i>High</i>                  | Date of birth<br>Date of hospital admission                                                                                                                            |
|                                                        | <i>Unclear</i>               | Not reported                                                                                                                                                           |
| <b>Allocation concealment</b>                          | <i>Low</i>                   | Central randomization<br>Sequentially numbered, opaque, sealed envelopes<br>Sequentially numbered drug containers of identical appearance                              |
|                                                        | <i>High</i>                  | Allocation based on date of birth, alternation<br>Open random allocation schedule<br>Unsealed envelopes                                                                |
|                                                        | <i>Unclear</i>               | Not reported                                                                                                                                                           |
| <b>Blinding participants and personnel<sup>1</sup></b> | <i>Low</i>                   | Blinding of participants and personnel<br>Low likelihood that blinding could have been broken                                                                          |
|                                                        | <i>High</i>                  | Any situation where blinding of participants and personnel is not possible (e.g. surgical treatment)<br>Subjective outcome likely to be influenced by lack of blinding |
|                                                        | <i>Unclear</i>               | Incomplete information                                                                                                                                                 |
| <b>Blinding outcome assessor<sup>1</sup></b>           | <i>Low</i>                   | No blinding but with objective outcome<br>Blinding of outcome assessor                                                                                                 |
|                                                        | <i>High</i>                  | Subjective outcome likely to be influenced by lack of blinding                                                                                                         |
|                                                        | <i>Unclear</i>               | Incomplete information                                                                                                                                                 |

## INCOMPLETE OUTCOME DATA

Attrition bias due to amount, nature or handling of incomplete outcome data.

Criteria for a judgement of ‘Low risk’ of bias: Any one of the following:

- No missing outcome data;
- Reasons for missing outcome data unlikely to be related to true outcome (for survival data, censoring unlikely to be introducing bias);
- Missing outcome data balanced in numbers across intervention groups, with similar reasons for missing data across groups;
- For dichotomous outcome data, the proportion of missing outcomes compared with observed event risk not enough to have a clinically relevant impact on the intervention effect estimate;
- Missing data have been imputed using appropriate methods.

Criteria for the judgement of ‘High risk’ of bias.

Any one of the following:

Reason for missing outcome data likely to be related to true outcome, with either imbalance in numbers or reasons for missing data across intervention groups;

- For dichotomous outcome data, the proportion of missing outcomes compared with observed event risk enough to induce clinically relevant bias in intervention effect estimate;
- ‘As-treated’ analysis done with substantial departure of the intervention received from that assigned at randomization;
- Potentially inappropriate application of simple imputation.

Criteria for the judgement of ‘Unclear risk’ of bias.

Any one of the following:

- Insufficient reporting of attrition/exclusions to permit judgement of ‘Low risk’ or ‘High risk’ (e.g. number randomized not stated, no reasons for missing data provided);
- The study did not address this outcome.

---

<sup>1</sup>In a secondary analysis the two items related to blinding were also reconsidered as low risk of bias in the case of objective outcomes. Results remained unchanged.
