# Supplementary material
Source: PubMed Central journal article supplement (PMC4794029)
Supplement: abri021963.ww5_default.pdf [file abri021963.ww5_default.pdf]

## Appendix 5.

### List of Excluded Reviews with Reasons

| <b>AUTHOR</b>       | <b>Journal</b>                     | <b>Year</b> | <b>Title</b>                                                                                                                                                              | <b>Reason for exclusion</b> |
|---------------------|------------------------------------|-------------|---------------------------------------------------------------------------------------------------------------------------------------------------------------------------|-----------------------------|
| <b>Addy</b>         | Journal of Clinical Periodontology | 2007        | Meta-analyses of studies of 0.2% delmopinol mouth rinse as an adjunct to gingival health and plaque control measures                                                      | Continuos data              |
| <b>Brener</b>       | Atherosclerosis                    | 2011        | The relationship between late lumen loss and restenosis among various drug-eluting stents: a systematic review and meta-regression analysis of randomized clinical trials | Continuos data              |
| <b>Buscemi</b>      | BMJ                                | 2006        | Efficacy and safety of exogenous melatonin for secondary sleep disorders and sleep disorders accompanying sleep restriction: meta-analysis                                | Continuos data              |
| <b>Charlton</b>     | Cochrane Database Syst Rev         | 2010        | Perioperative transversus abdominis plane (TAP) blocks for analgesia after abdominal surgery                                                                              | Continuos data              |
| <b>Conn</b>         | Semin Arthritis Rheum              | 2008        | Physical Activity Interventions Among Adults with Arthritis: Meta-Analysis of Outcomes                                                                                    | Continuos data              |
| <b>Fidelix</b>      | The Cochrane Library               | 2006        | Diacerein for osteoarthritis                                                                                                                                              | Continuos data              |
| <b>Frieling</b>     | Eur Neuropsychopharmacol           | 2007        | Treating dopamimetic psychosis in Parkinson's disease: structured review and meta-analysis                                                                                | Continuos data              |
| <b>Hedges</b>       | J Psychopharmacol                  | 2007        | The efficacy of selective serotonin reuptake inhibitors in adult social anxiety disorder: a meta-analysis of double-blind, placebo-controlled trials                      | Continuos data              |
| <b>Li</b>           | Respiration                        | 2007        | Combination therapy with the single inhaler salmeterol/fluticasone propionate versus increased doses of inhaled corticosteroids in patients with asthma                   | Continuos data              |
| <b>Ma</b>           | clinical nutrition                 | 2008        | Soy isoflavone intake increases bone mineral density in the spine of menopausal women: Meta-analysis of randomized controlled trials                                      | Continuos data              |
| <b>Mannucci</b>     | Diabetes, Obesity and Metabolism   | 2009        | Short-acting insulin analogues vs. regular human insulin in type 2 diabetes: a meta-analysis                                                                              | Continuos data              |
| <b>Osei-Assibey</b> | Diabetes Obes Metab                | 2011        | Pharmacotherapy for overweight/obesity in ethnic minorities and White Caucasians: a                                                                                       | Continuos data              |

|                    |                                                                      |      |                                                                                                                                                                                          |                   |
|--------------------|----------------------------------------------------------------------|------|------------------------------------------------------------------------------------------------------------------------------------------------------------------------------------------|-------------------|
|                    |                                                                      |      | systematic review and meta-analysis                                                                                                                                                      |                   |
| <b>Qi</b>          | Perit Dial Int                                                       | 2011 | Comparison of icodextrin and glucose solutions for long dwell exchange in peritoneal dialysis: a meta-analysis of randomized controlled trials                                           | Continuos data    |
| <b>Rahimi</b>      | Progressi in neuro-<br>psychopharmacology &<br>biological psychiatry | 2009 | Efficacy and tolerability of Hyoericum perforatum in major depressive disorder in comparison with selective serotonin reuptake inhibitors: a meta-analysis                               | Continuos data    |
| <b>Segool</b>      | Depression and anxiety                                               | 2008 | Efficacy of cognitive-behavioral and pharmacological treatments for children with social anxiety                                                                                         | Continuos data    |
| <b>Slade</b>       | Journal of Manipulative and<br>Physiological Therapeutics            | 2006 | Trunk-strengthening exercises for chronic low back pain: a systematic review                                                                                                             | Continuos data    |
| <b>Towheed</b>     | J Rheumatol                                                          | 2006 | Pennsaid therapy for osteoarthritis of the knee: a systematic review and metaanalysis of randomized controlled trials                                                                    | Continuos data    |
| <b>Webers</b>      | Ophthalmology                                                        | 2007 | Intraocular pressure-lowering effect of adding dorzolamide or latanoprost to timolol: a meta-analysis of randomized clinical trials                                                      | Continuos data    |
| <b>Wei</b>         | European journal of clinical<br>nutrition                            | 2009 | Time- and dose-dependent effect of psyllium on serum lipids in mild-to-moderate hypercholesterolemia: a meta-analysis of controlled clinical trials                                      | Continuos data    |
| <b>Berlie</b>      | Diabetes Res Clin Pract                                              |      | Thiazolidinediones and the risk of edema: a meta-analysis                                                                                                                                | Adverse events    |
| <b>Honrubia</b>    | Br J Ophthalmol                                                      | 2009 | Conjunctival hyperaemia with the use of latanoprost versus other prostaglandin analogues in patients with ocular hypertension or glaucoma: a meta-analysis of randomised clinical trials | Adverse events    |
| <b>Trocme</b>      | Ann Pharmacother                                                     | 2010 | The role of benzalkonium chloride in the occurrence of punctate keratitis: a meta-analysis of randomized, controlled clinical trials                                                     | Adverse events    |
| <b>Zhu</b>         | Acta oncologica                                                      | 2009 | Risk of hypertension and renal dysfunction with an angiogenesis inhibitor sunitinib: systematic review and meta-analysis                                                                 | Adverse events    |
| <b>Christensen</b> | Osteoarthritis and Cartilage                                         | 2008 | Symptomatic efficacy of avocadosoybean unsaponifiables (ASU) in osteoarthritis (OA) patients: a meta-analysis of randomized controlled trials                                            | Secondary outcome |

|                  |                                    |      |                                                                                                                                                                                        |                                                     |
|------------------|------------------------------------|------|----------------------------------------------------------------------------------------------------------------------------------------------------------------------------------------|-----------------------------------------------------|
| <b>Oliveira</b>  | J Assist Reprod Genet              | 2007 | Recombinant luteinizing hormone supplementation to recombinant follicle-stimulation hormone during induced ovarian stimulation in the GnRH-agonist protocol: a meta-analysis           | Secondary outcome                                   |
| <b>Tarr</b>      | J Affect Disord                    | 2011 | Comparative efficacy and acceptability of mood stabilizer and second generation antipsychotic monotherapy for acute mania--a systematic review and meta-analysis                       | Secondary outcome                                   |
| <b>Gallo</b>     | The Cochrane Library               | 2006 | Non-latex versus latex male condoms for contraception                                                                                                                                  | A mITT trial does not contribute to a meta-analysis |
| <b>Michael M</b> | Americal Journal of kidney disease | 2009 | Interventions for hemolytic uremic syndrome and thrombotic thrombocytopenic purpura: a systematic review of randomized controlled trials                                               | A mITT trial does not contribute to a meta-analysis |
| <b>Craig</b>     | The Cochrane Library               | 2006 | Galantamine for vascular cognitive impairment                                                                                                                                          | All included trials using mITT                      |
| <b>Falagas</b>   | Int J Antimicrob Agents            | 2007 | Caspofungin for the treatment of fungal infections: a systematic review of randomized controlled trials                                                                                | All included trials using mITT                      |
| <b>Shyangdan</b> | BMC Endocr Disord                  | 2010 | Glucagon-like peptide analogues for type 2 diabetes mellitus: systematic review and meta-analysis                                                                                      | All included trials using mITT                      |
| <b>Leucht</b>    | Mol Psychiatry                     | 2009 | How effective are second-generation antipsychotic drugs? A meta-analysis of placebo-controlled trials                                                                                  | Head-to-head comparison                             |
| <b>Macedo</b>    | European Journal of Pain           | 2008 | Placebo response in the prophylaxis of migraine: A meta-analysis                                                                                                                       | Methodological study                                |
| <b>Jolly</b>     | Am Heart J                         | 2009 | Radial versus femoral access for coronary angiography or intervention and the impact on major bleeding and ischemic events: a systematic review and meta-analysis of randomized trials | Type of intervention (access)                       |
| <b>De Luca</b>   | J Thromb Thrombolysis              | 2009 | Benefits of pharmacological facilitation with glycoprotein IIb-IIIa inhibitors in diabetic patients undergoing primary angioplasty for STEMI. A subanalysis of the EGYPT               | Secondary analysis                                  |

## List of excluded primary studies with reasons

| Reviews         | Randomized trial      | Journal                  | Year | Title                                                                                                                                                                  | Reason for exclusion               |
|-----------------|-----------------------|--------------------------|------|------------------------------------------------------------------------------------------------------------------------------------------------------------------------|------------------------------------|
| Wang A 2010     | <b>De Simone</b>      | Am J Transplant          | 2007 | Results of a multicenter, randomized, open-label trial comparing basiliximab vs steroids in HCV liver transplant patients                                              | Abstract                           |
| Bai 2008        | <b>Schwarz</b>        | Dtsch Med Wochenschr     | 1997 | Antibiotic use in necrotizing pancreatitis. Results of a controlled study                                                                                              | abstract                           |
| Humber 2007     | <b>Long</b>           | Proc Am Soc Clin Oncol   | 1995 | Comparison of methotrexate, vinblastine, doxorubicin and cisplatin (MVAC) vs doxorubicin and cisplatin (AC) in advanced endometrial carcinoma.                         | abstract                           |
| Brock 2006      | <b>Buti</b>           | J Hepatol                | 1991 | Ribavirin therapy for chronic type C hepatitis.                                                                                                                        | abstract                           |
| Brock 2006      | <b>Pawlotsky</b>      | Hepatology 1998          |      | Effect of intermittent interferon (IFN), daily IFN and IFN plus ribavirin induction therapy on hepatitis C virus (HCV) genotype 1b replication kinetics and clearance. | abstract                           |
| Seo 2009        | <b>Semiglazov</b>     | Proc Am Soc Clin Oncol   | 2005 | Exemestane (E) vs tamoxifen (T) as neoadjuvant endocrine therapy for postmenopausal women with ER + breast cancer (T2N1-2, T3N0-1, T4N0M0)                             | abstract                           |
| Leucht 2009     | <b>Kryzhanovskaya</b> | Biol Psychiatry          | 2006 | A double-blind, placebo-controlled study of olanzapine in adolescents with schizophrenia.                                                                              | abstract                           |
| Leucht 2009     | <b>Lecrubier</b>      | Eur Neuropsychopharmacol | 1999 | Olanzapine versus amisulpride and placebo in the treatment of negative symptoms and deficit states of chronic schizophrenia.                                           | abstract                           |
| Leucht 2009     | <b>Study 94202.</b>   | -                        | 2002 | Center for Drug Evaluation and Research. Study 94202. Application number 21-436. Medical review(s). <a href="http://www.fda.gov">http://www.fda.gov</a> ,              | unpublished (report not available) |
| Papakostas 2008 | <b>97-CRBX-052</b>    | -                        | -    | Not provided                                                                                                                                                           | unpublished (report not available) |
| Papakostas 2008 | <b>M-2020-0032</b>    | -                        | -    | Not provided                                                                                                                                                           | unpublished (report not available) |

|                 |                                                    |                                   |      |                                                                                                                                                                                                                                                                                                                                                                                             |                                        |
|-----------------|----------------------------------------------------|-----------------------------------|------|---------------------------------------------------------------------------------------------------------------------------------------------------------------------------------------------------------------------------------------------------------------------------------------------------------------------------------------------------------------------------------------------|----------------------------------------|
|                 |                                                    |                                   |      |                                                                                                                                                                                                                                                                                                                                                                                             | available)                             |
| Papakostas 2008 | <b>M-2020-0046</b>                                 | -                                 | -    | Not provided                                                                                                                                                                                                                                                                                                                                                                                | unpublished<br>(report not available)  |
| Papakostas 2008 | <b>M-2020-0047</b>                                 | -                                 | -    | Not provided                                                                                                                                                                                                                                                                                                                                                                                | Unpublished<br>(report not available)  |
| Leucht 2009     | <b>Zborowski</b>                                   | Not provided                      | 1995 | Efficacy and safety of sertindole in a trial of schizophrenic patients. (Presented at the Congress of the American Psychiatric Association in Miami)                                                                                                                                                                                                                                        | Unpublished<br>(report not available): |
| Leucht 2009     | <b>Study Ris-USA-72.<br/>NDA number:<br/>20272</b> | -                                 | 1996 | Office of Clinical Pharmacology and Biopharmacy Review. Study Ris-USA-72. NDA number: 20272. Janssen-Cilag, Data on File.                                                                                                                                                                                                                                                                   | Unpublished<br>(report not available): |
| Leucht 2009     | <b>Zimbhoff</b>                                    | Am J Psychiatry                   | 1997 | Controlled, dose response study of sertindole and haloperidol in the treatment of schizophrenia.                                                                                                                                                                                                                                                                                            | Data not available                     |
| Harris 2010     | <b>Johnston</b>                                    | J Clin Oncol                      | 2009 | Lapatinib combined with letrozole versus letrozole and placebo as first-line therapy for postmenopausal hormone receptorpositive metastatic breast cancer.                                                                                                                                                                                                                                  | Data not available                     |
| Imran 2008      | <b>Rafecas</b>                                     | Revista Espanola de Quimioterapia |      | Oral ciprofloxacin in the prophylaxis of bacterial infection in neutropenic patients. A randomized, double blind, comparative clinical study.                                                                                                                                                                                                                                               | Spanish language                       |
| Imran 2008      | <b>Thomas</b>                                      | Presse Med                        | 2000 | Effectiveness of combined vancomycin and pefloxacin in gastrointestinal decontamination for preventing infections after chemotherapy-induced bone marrow aplasia. A randomized double-blind study                                                                                                                                                                                           | French language                        |
| Naber 2009      | <b>Pisani</b>                                      |                                   | 1992 | Double-blind randomised clinical study of OM-8930 vs placebo in patients suffering from recurrent urinary tract infections. Geneva, Switzerland:OMPharma ( <i>quoted in Quoted in: Chiavaroli C, Moore A. An hypothesis to link the opposing immunological effects induced by the bacterial lysate OM-89 in urinary tract infection and rheumatoid arthritis. BioDrugs 2006;20:141-9.</i> ) | Publication not available              |
