# Supplementary material
Source: PubMed Central journal article supplement (PMC4794029)
Supplement: abri021963.ww6_default.pdf [file abri021963.ww6_default.pdf]

### Web appendix 6. Characteristics of Included Meta-analyses

| Study (year)        | Condition studied             | Intervention in Active Group              | Intervention in Control Group                 | Outcome                                                                                               | N of RCTs (mITT/ ITT/ “noITT”) | Pooled Odds Ratio | Heterogeneity      |         |                  |
|---------------------|-------------------------------|-------------------------------------------|-----------------------------------------------|-------------------------------------------------------------------------------------------------------|--------------------------------|-------------------|--------------------|---------|------------------|
|                     |                               |                                           |                                               |                                                                                                       |                                |                   | I <sup>2</sup> . % | P value | Tau <sup>2</sup> |
| Birks 2006 [36]     | Alzheimer’s disease           | Cholinesterase inhibitors                 | Placebo                                       | Global assessment with carer input (CIBIC-Plus scale)                                                 | 6 (3/3/0)                      | 0.56 (0.44-0.71)  | 29.79              | 0.212   | 0.028            |
| Brok 2006 [37]      | Chronic Hepatitis C Infection | Ribavirin                                 | Placebo                                       | Failure of end of treatment                                                                           | 9 (2/1/6)                      | 0.89 (0.29-2.72)  | 0.00               | 1.00    | 0.00             |
| Dodd 2006 [38]      | Preterm birth prevention      | Progesterone                              | Placebo                                       | Perinatal death                                                                                       | 3 (1/1/1)                      | 0.66 (0.30-1.45)  | 34.12              | 0.219   | 0.168            |
| Jefferson 2006 [39] | Influenza                     | Inhaled zanamivir                         | Placebo                                       | Influenza cases (laboratory-confirmed influenza with or without symptoms)                             | 2 (1/1/0)                      | 0.36 (0.17-0.78)  | 60.50              | 0.112   | 0.18             |
| Obonyo 2006 [40]    | Meningitis prevention         | Haemophilus influenzae type b vaccination | Placebo or no-treatment                       | Vaccine efficacy (Haemophilus influenzae isolated from a normally sterile body fluid)                 | 8 (1/3/4)                      | 0.15 (0.08-0.31)  | 67.72              | 0.00    | 0.610            |
| Paul 2006 [41]      | Sepsis                        | Same beta-lactam monotherapy              | Beta-lactam monotherapy + combination therapy | All-cause fatality                                                                                    | 11(2/1/8)                      | 1.02 (0.70-1.49)  | 0.00               | 0.46    | 0.00             |
|                     |                               | Different beta-lactam monotherapy         | Beta-lactam monotherapy + combination therapy | All-cause fatality                                                                                    | 20(3/7/10)                     | 0.77 (0.56-1.05)  | 31.59              | 0.104   | 0.12             |
| Rendell 2006 [42]   | Acute mania                   | Risperidone                               | Placebo                                       | Failure to complete treatment                                                                         | 4 (2/0/2)                      | 0.39 (0.24-0.63)  | 68.72              | 0.022   | 0.164            |
| Schneider 2006 [43] | Dementia                      | Atypical antipsychotics (Risperidone)     | Placebo                                       | 50% improvement (BEHAVE-AD)                                                                           | 3 (2/1/0)                      | 0.56 (0.42-0.75)  | 12.56              | 0.319   | 0.008            |
| Humber 2007 [44]    | Endometrial cancer            | Addition of doxorubicin or cisplatin      | Standard chemotherapy                         | Progression free survival (definition and time point not reported)                                    | 5 (1/2/2)                      | 0.95 (0.32-2.82)  | 72.53              | 0.006   | 0.96             |
| Kosmas 2007 [45]    | Pregnancy                     | GnRH antagonist                           | No-treatment                                  | Clinical pregnancy (definition not reported)                                                          | 6(1/1/4)                       | 0.64 (0.43-0.96)  | 17.77              | 0.298   | 0.045            |
| Mariappan 2007 [46] | Urinary incontinence          | Duloxetine                                | Placebo                                       | Symptom improvement (determined by participants’ subjective assessments or clinicians’ observations.) | 4 (3/1/0)                      | 0.43 (0.24-0.75)  | 86.10              | 0.00    | 0.27             |
| Rahimi 2007 [47]    | Crohn’s disease               | Anti-tumor necrosis factors               | Placebo                                       | Clinical response after 2 weeks                                                                       | 7 (6/1/0)                      | 0.52 (0.31-0.86)  | 61.92              | 0.015   | 0.27             |

|                       |                                       |                                                                     |                                         |                                                    |             |                  |       |       |       |
|-----------------------|---------------------------------------|---------------------------------------------------------------------|-----------------------------------------|----------------------------------------------------|-------------|------------------|-------|-------|-------|
| Rodrigo 2007 [48]     | Chronic obstructive pulmonary disease | Tiotropium                                                          | Placebo                                 | COPD-related exacerbations                         | 8 (3/1/4)   | 0.76 (0.66-0.87) | 0.00  | 0.71  | 0.00  |
| Bai 2008 [49]         | Acute necrotizing Pancreatitis        | Antibiotic                                                          | Placebo or no treatment                 | Infection pancreatic necrosis (CT-proven necrosis) | 6 (1/1/4)   | 0.56 (0.27-1.13) | 47.9  | 0.09  | 0.37  |
| Coomarasamy 2008 [50] | Pregnancy                             | Urinary hMG                                                         | Recombinant FSH                         | Increase in live birth rate                        | 7 (2/1/4)   | 0.84 (0.68-1.02) | 0.00  | 0.92  | 0.00  |
| Imran 2008 [51]       | Neutropenia                           | Fluoroquinolone                                                     | Placebo                                 | Mortality                                          | 6 (1/2/3)   | 0.78 (0.53-1.15) | 0.00  | 0.46  | 0.00  |
| Lee 2008 [52]         | Rheumatoid arthritis                  | Combination of TNF inhibitors plus Methotrexate                     | Methotrexate monotherapy                | ACR 20% response                                   | 3 (1/1/1)   | 0.31 (0.17-0.57) | 75.29 | 0.017 | 0.206 |
| Papakostas 2008 [53]  | Major depressive disorder             | Reboxetine                                                          | Selective serotonin reuptake inhibitors | Response rate                                      | 5 (1/1/3)   | 0.93 (0.62-1.40) | 48.74 | 0.099 | 0.100 |
| Ravindran 2008 [54]   | Psoriatic arthritis                   | Biological agents and disease modifying anti-rheumatic drugs        | Placebo                                 | Efficacy based on withdrawal due to efficacy       | 18 (6/3/9)  | 0.35 (0.22-0.55) | 26.9  | 0.18  | 0.16  |
| Sjalander 2008 [55]   | Thromboembolism                       | Anticoagulant prophylaxis                                           | Placebo                                 | Asymptomatic deep vein thrombosis                  | 6 (2/2/2)   | 0.46 (0.35-0.61) | 0.00  | 0.82  | 0.00  |
| Weinmann 2008 [56]    | Major depression                      | Venlafaxine                                                         | Selective serotonin reuptake inhibitors | Remission rates                                    | 15 (12/3/0) | 0.88 (0.76-1.02) | 0.00  | 0.51  | 0.00  |
| Azim 2009 [57]        | Lung cancer                           | Third generation triplet therapy                                    | Standard therapy                        | Response rate                                      | 6 (1/3/2)   | 0.50 (0.36-0.69) | 57.5  | 0.038 | 0.09  |
| Baker 2009 [58]       | Parkinson's disease                   | Dopamine agonists                                                   | Levodopa                                | Wearing off                                        | 6 (1/2/3)   | 0.53 (0.41-0.69) | 30.4  | 0.21  | 0.03  |
| Cranney 2009 [59]     | Non-vertebral fractures               | Ibandronate                                                         | Placebo                                 | Prevention of non-vertebral fractures              | 8(2/5/1)    | 0.90 (0.71-1.15) | 17.84 | 0.29  | 0.018 |
| Jang 2009 [60]        | Aneurysmal subarachnoid hemorrhage    | Tirilazad mesylate                                                  | Placebo                                 | Glasgow outcome score                              | 5 (1/1/3)   | 1.05 (0.91-1.22) | 0.0   | 0.42  | 0.00  |
| Katchamart 2009 [61]  | Rheumatoid arthritis                  | Methotrexate + non-biological disease-modifying antirheumatic drugs | Methotrexate                            | 20% response in the ACR score                      | 4 (1/1/2)   | 0.24 (0.17-0.36) | 0.00  | 0.79  | 0.00  |
| Leucht 2009 [62]      | Schizophrenia                         | Arisulpiride                                                        | Placebo                                 | Non responder rate <sup>2</sup>                    | 4 (3/1/0)   | 0.52 (0.38-0.71) | 0.00  | 0.526 | 0.00  |
|                       |                                       | Haloperidol                                                         | Placebo                                 | Non responder rate <sup>2</sup>                    | 7 (4/3/0)   | 0.45 (0.31-0.65) | 18.78 | 0.286 | 0.045 |
|                       |                                       | Olanzapine                                                          | Placebo                                 | Non responder rate <sup>2</sup>                    | 2(0/2/0)    | 0.63 (0.34-1.18) | 29.66 | 0.233 | 0.066 |

|                        |                               |                                     |                                          |                                                                                                           |            |                  |       |       |       |
|------------------------|-------------------------------|-------------------------------------|------------------------------------------|-----------------------------------------------------------------------------------------------------------|------------|------------------|-------|-------|-------|
| Naber 2009 [63]        | Urinary infection             | Quetapine                           | Placebo                                  | Non responder rate <sup>2</sup>                                                                           | 5 (4/0/1)  | 0.54 (0.33-0.87) | 46.18 | 0.115 | 0.136 |
|                        |                               | Risperidone                         | Placebo                                  | Non responder rate <sup>2</sup>                                                                           | 6 (1/4/1)  | 0.33 (0.23-0.49) | 14.28 | 0.323 | 0.027 |
|                        |                               | OM-89                               | Placebo                                  | Proportion of patients without recurrent infection (definition not reported)                              | 4 (1/0/3)  | 0.28 (0.15-0.56) | 76.25 | 0.006 | 0.35  |
| Nikfar 2009 [64]       | Ulcerative Colitis            | Olsalazine                          | Sulfasalazine                            | Relapse of the disease (clinical activity index alone or + other data (endoscopic, histologic, laboratory | 5 (3/0/2)  | 0.88 (0.66-1.18) | 0.00  | 0.59  | 0.00  |
| Rhorer 2009 [65]       | Influenza                     | Influenza vaccine                   | Placebo or inactivated influenza vaccine | Influenza prevention (culture confirmed symptomatic influenza illness)                                    | 10 (7/0/3) | 0.25 (0.17-0.38) | 89.8  | 0.000 | 0.34  |
| Seo 2009 [66]          | Breast cancer                 | Aromatase inhibitor                 | Tamoxifen                                | Clinical response rate                                                                                    | 3 (1/2/0)  | 0.72 (0.47-1.10) | 63.71 | 0.064 | 0.092 |
| Van de Broek 2009 [67] | Depressive disorders          | Venlafaxine                         | Tricyclic antidepressants                | Response rate (decrease in the depression rating scale HRSD/MADRS)                                        | 7 (5/2/0)  | 0.86 (0.55-1.34) | 59.51 | 0.022 | 0.212 |
| Zou 2009 [68]          | Hypertension                  | Telmisartan                         | Enalapril                                | Response rate in diastolic blood pressure                                                                 | 7 (4/1/2)  | 0.69 (0.55-0.88) | 0.00  | 0.96  | 0.00  |
|                        |                               | Telmisartan                         | Ramipril                                 | Response rate in diastolic blood pressure                                                                 | 2(1/0/1)   | 0.55 (0.37-0.82) | 72.84 | 0.055 | 0.059 |
| Guaiana 2010 [69]      | Generalized anxiety disorder  | Hydroxyzine                         | Placebo                                  | Acceptability (the number of patients who failed to complete the study) <sup>3</sup>                      | 4 (1/1/2)  | 0.97 (0.59-1.59) | 18.9  | 0.29  | 0.04  |
| Harris 2010 [70]       | Breast cancer                 | HER-targeted agents                 | Standard treatment for breast cancer     | Mortality (no time point provided)                                                                        | 4 (1/3/0)  | 0.80 (0.65-0.98) | 0.0   | 0.93  | 0.00  |
| Komossa 2010 [71]      | Obsessive compulsive disorder | Quetiapine added to antidepressants | Placebo added to antidepressants         | No clinically important change - (less than 35% YBOCS reduction)                                          | 5 (2/2/1)  | 0.60 (0.29-1.23) | 19.8  | 0.29  | 0.13  |
| Michael 2010 [72]      | Fall prevention               | Vitamin D                           | Placebo or calcium                       | Fall <sup>4</sup>                                                                                         | 9 (3/6/0)  | 0.72 (0.58-0.88) | 56.2  | 0.019 | 0.05  |
| Nikfar 2010 [73]       | Chron's disease               | Tacrolimus                          | Placebo                                  | At least 50% reduction in the number of open actively draining fistulas                                   | 4 (3/1/0)  | 0.18 (0.09-0.38) | 0.0   | 0.82  | 0.00  |
| Roskell 2010 [74]      | Fibromyalgia                  | Milnacipran                         | Placebo                                  | 30% pain response (visual analog scale)                                                                   | 2(1/1/0)   | 0.62 (0.42-0.92) | 0.0   | 0.78  | 0.00  |
| Siler 2010 [75]        | Fibromyalgia                  | Pregabalin                          | Placebo                                  | Pain reduction of 30% (on an 11-point scale)                                                              | 4 (3/1/0)  | 0.70 (0.54-0.91) | 0.0   | 0.71  | 0.00  |

|                     |                          |                                   |                                  |                                                                    |             |                  |      |       |      |
|---------------------|--------------------------|-----------------------------------|----------------------------------|--------------------------------------------------------------------|-------------|------------------|------|-------|------|
| Wang 2010<br>[76]   | Liver<br>Transplantation | Basiliximab                       | Placebo                          | Incidence of biopsy-proven acute rejection                         | 3 (1/1/1)   | 0.87 (0.53-1.43) | 27.1 | 0.25  | 0.05 |
|                     |                          | Daclizumab                        | Tacrolimus                       | Incidence of biopsy-proven acute rejection                         | 8(4/2/2)    | 0.67 (0.45-0.96) | 62.4 | 0.009 | 0.15 |
| Xu 2010<br>[15]     | Advanced breast cancer   | Taxane-based doublet chemotherapy | Single-agent taxane chemotherapy | Progression free survival (definition and time point not reported) | 4 (1/3/0)   | 0.87 (0.52-1.49) | 87.9 | 0.000 | 0.25 |
| Ziakas 2010<br>[77] | Neutropenia              | Antifungal therapy                | Placebo or no treatment          | Systemic proven fungal infections                                  | 22 (6/2/14) | 0.42 (0.29-0.59) | 24.1 | 0.150 | 0.16 |

<sup>1</sup> Effective publication year might vary due to *online first publication*. We attributed the year of publication for each trial according to the year provided by Pubmed filter.

<sup>2</sup> Response defined as 50% or more reduction from baseline on the PANSS/BPRS scale.

<sup>3</sup> This outcome did not consider side effects; for side effects there was tolerability as a specific outcome.

4 Definition of falls not provided but the review underlined that the methods of fall ascertainment between the trials were heterogeneous.

mITT, modified intention-to-treat; ITT, intention-to-treat; CIBIC-Plus, Clinician's Interview-Based Impression of Change scale; GnRH, Gonadotropin Releasing Hormone; COPD, Chronic obstructive pulmonary disease; BEHAVE-AD, Behavioral Pathology in Alzheimer's Disease Rating Scale; CT, Computed Tomography; TNF, Tumor Necrosis Factor; FSH, Follicle-Stimulating Hormone; hGM, Human Menopausal Gonadotropin; ACR, American College of Rheumatology; PANSS, Positive and Negative Syndrome Scale; BPRS, Brief Psychiatric Rating Scale; HRSD, Hamilton Rating Scale for Depression; MADRS, Montgomery and Asberg Rating Scale; HER, Human EGF (Epidermal Growth Factor) Receptor; Y-BOCS, Yale-Brown Obsessive-Compulsive Scale

#### References

- Birks J. Cholinesterase inhibitors for Alzheimer's disease. *Cochrane Database Syst Rev* 2006;1:CD005593.
- Brok J, Gluud LL, Gluud C. Ribavirin monotherapy for chronic hepatitis C infection: a Cochrane Hepato-Biliary Group systematic review and meta-analysis of randomized trials. *Am J Gastroenterol* 2006;101:842-7.
- Dodd JM, Flenady VF, Cincotta R, Crowther CA. Prenatal administration of progesterone for preventing preterm birth. *Cochrane Database Syst Rev* 2006;1:CD004947.
- Jefferson T, Demicheli V, Rivetti D, Jones M, Di Pietrantonj C, Rivetti A. Antivirals for influenza in healthy adults: systematic review. *Lancet* 2006;367:303-13.

- Obonyo CO, Lau J. Efficacy of Haemophilus influenzae type b vaccination of children: a meta-analysis. *Eur J Clin Microbiol Infect Dis* 2006;25:90-7.
- Paul M, Silbiger I, Grozinsky S, Soares-Weiser K, Leibovici L. Beta lactam antibiotic monotherapy versus beta lactam-aminoglycoside antibiotic combination therapy for sepsis. *Cochrane Database Syst Rev* 2006;1:CD003344.
- Rendell JM, Gijnsman HJ, Bauer MS, Goodwin GM, Geddes GR. Risperidone alone or in combination for acute mania. *Cochrane Database Syst Rev* 2006;1:CD004043.
- Schneider LS, Dagerman K, Insel PS. Efficacy and adverse effects of atypical antipsychotics for dementia: meta-analysis of randomized, placebo-controlled trials. *Am J Geriatr Psychiatry* 2006;14:191-210.
- Humber CE, Tierney JF, Symonds RP, et al. Chemotherapy for advanced, recurrent or metastatic endometrial cancer: a systematic review of Cochrane collaboration. *Ann Oncol* 2007;18:409-20.
- Kosmas IP, Tatsioni A, Kolibianakis EM, et al. Effects and clinical significance of GnRH antagonist administration for IUI timing in FSH superovulated cycles: a meta-analysis. *Fertil Steril* 2008;90:367-72.
- Mariappan P, Alhasso A, Ballantyne Z, Grant A, N'Dow J. Duloxetine, a serotonin and noradrenaline reuptake inhibitor (SNRI) for the treatment of stress urinary incontinence: a systematic review. *Eur Urol* 2007;51:67-74.
- Rahimi R, Nikfar S, Abdollahi M. Do anti-tumor necrosis factors induce response and remission in patients with acute refractory Crohn's disease? A systematic meta-analysis of controlled clinical trials. *Biomed Pharmacother* 2006;61:75-80.
- Rodrigo GJ, Nannini LJ. Tiotropium for the treatment of stable chronic obstructive pulmonary disease: a systematic review with meta-analysis. *Pulm Pharmacol Ther* 2007;20:495-502.
- Bai Y, Gao J, Zou DW, Li ZS. Prophylactic antibiotics cannot reduce infected pancreatic necrosis and mortality in acute necrotizing pancreatitis: evidence from a meta-analysis of randomized controlled trials. *Am J Gastroenterol* 2008;103:104-10.

- Coomarasamy A, Afnan M, Cheema D, van der Veen F, Bossuyt PM, van Wely M. Urinary hMG versus recombinant FSH for controlled ovarian hyperstimulation following an agonist long down-regulation protocol in IVF or ICSI treatment: a systematic review and meta-analysis. *Hum Reprod* 2008;23:310-5.
- Imran H, Tleyjeh IM, Arndt CA, et al. Fluoroquinolone prophylaxis in patients with neutropenia: a meta-analysis of randomized placebo-controlled trials. *Eur J Clin Microbiol Infect Dis* 2008;27:53-63.
- Lee YH, Woo JH, Rho YH, Choi SJ, Ji JD, Song GG. Meta-analysis of the combination of TNF inhibitors plus MTX compared to MTX monotherapy, and the adjusted indirect comparison of TNF inhibitors in patients suffering from active rheumatoid arthritis. *Rheumatol Int* 2008;28:553-9.
- Papakostas GI, Nelson JC, Kasper S, Moller HJ. A meta-analysis of clinical trials comparing reboxetine, a norepinephrine reuptake inhibitor, with selective serotonin reuptake inhibitors for the treatment of major depressive disorder. *Eur Neuropsychopharmacol* 2008;18:122-7.
- Ravindran V, Scott DL, Choy EH. A systematic review and meta-analysis of efficacy and toxicity of disease modifying anti-rheumatic drugs and biological agents for psoriatic arthritis. *Ann Rheum Dis* 2008;67:855-9.
- Sjalander A, Jansson JH, Bergqvist D, Eriksson H, Carlberg B, Svensson P. Efficacy and safety of anticoagulant prophylaxis to prevent venous thromboembolism in acutely ill medical inpatients: a meta-analysis. *J Intern Med* 2008;263:52-60.
- Weinmann S, Becker T, Koesters M. Re-evaluation of the efficacy and tolerability of venlafaxine vs SSRI: meta-analysis. *Psychopharmacology* 2008;196:511-20.
- Azim HA Jr, Elattar I, Loberiza FR Jr, Azim H, Mok T, Ganti AK. Third generation triplet cytotoxic chemotherapy in advanced non-small cell lung cancer: a systematic overview. *Lung Cancer* 2009;64:194-8.
- Baker WL, Silver D, White CM, et al. Dopamine agonists in the treatment of early Parkinson's disease: a meta-analysis. *Parkinsonism Relat Disord* 2009;15:287-94.

- Cranney A, Wells GA, Yetisir E, et al. Ibandronate for the prevention of nonvertebral fractures: a pooled analysis of individual patient data. *Osteoporos Int* 2009;20:291-7.
- Jang YG, Ilodigwe D, Macdonald RL. Metaanalysis of tirilazad mesylate in patients with aneurysmal subarachnoid hemorrhage. *Neurocrit Care* 2009;10:141-7.
- Katchamart W, Trudeau J, Phumethum V, Bombardier C. Efficacy and toxicity of methotrexate (MTX) monotherapy versus MTX combination therapy with non-biological disease-modifying antirheumatic drugs in rheumatoid arthritis: a systematic review and meta-analysis. *Ann Rheum Dis* 2009;68:1105-12.
- Leucht S, Arbter D, Engel RR, Kissling W, Davis JM. How effective are second-generation antipsychotic drugs? A meta-analysis of placebo-controlled trials. *Mol Psychiatry* 2009;14:429-47.
- Naber KG, Cho YH, Matsumoto T, Schaeffer AJ. Immunoactive prophylaxis of recurrent urinary tract infections: a meta-analysis. *Int J Antimicrob Agents* 2009;33:111-9.
- Nikfar S, Rahimi R, Rezaie A, Abdollahi M. A meta-analysis of the efficacy of sulfasalazine in comparison with 5-aminosalicylates in the induction of improvement and maintenance of remission in patients with ulcerative colitis. *Dig Dis Sci* 2009;54:1157-70.
- Rhorer J, Ambrose CS, Dickinson S, et al. Efficacy of live attenuated influenza vaccine in children: a meta-analysis of nine randomized clinical trials. *Vaccine* 2009;27:1101-10.
- Seo JH, Kim YH, Kim JS. Meta-analysis of pre-operative aromatase inhibitor versus tamoxifen in postmenopausal woman with hormone receptor-positive breast cancer. *Cancer Chemother Pharmacol* 2009;63:261-6.
- van den Broek WW, Mulder PG, van Os E, Birkenhager TK, Pluijms E, Bruijn JA. Efficacy of venlafaxine compared with tricyclic antidepressants in depressive disorder: a meta-analysis. *J Psychopharmacol* 2009;23:708-13.

- Zou Z, Xi GL, Yuan HB, Zhu QF, Shi XY. Telmisartan versus angiotension-converting enzyme inhibitors in the treatment of hypertension: a meta-analysis of randomized controlled trials. *J Hum Hypertens* 2009;23:339-49.
- Guaiana G, Barbui C, Cipriani A. Hydroxyzine for generalised anxiety disorder. *Cochrane Database Syst Rev* 2010:CD006815.
- Harris CA, Ward RL, Dobbins TA, Drew AK, Pearson S. The efficacy of HER2-targeted agents in metastatic breast cancer: a meta-analysis. *Ann Oncol* 2010;22:1308-17.
- Komossa K, Depping AM, Meyer M, Kissling W, Leucht S. Second-generation antipsychotics for obsessive compulsive disorder. *Cochrane Database Syst Rev* 2010;12:CD008141.
- Michael YL, Whitlock EP, Lin JS, Fu R, O'Connor EA, Gold R. Primary care-relevant interventions to prevent falling in older adults: a systematic evidence review for the U.S. Preventive Services Task Force. *Ann Intern Med* 2010;153:815-25.
- Nikfar S, Mirfazaelian H, Abdollahi M. Efficacy and tolerability of immunoregulators and antibiotics in fistulizing Crohn's disease: a systematic review and meta-analysis of placebo-controlled trials. *Curr Pharm Des* 2010;16:3684-98.
- Roskell NS, Beard SM, Zhao Y, Le TK. A meta-analysis of pain response in the treatment of fibromyalgia. *Pain Pract* 2011;11:516-27.
- Siler AC, Gardner H, Yanit K, Cushman T, McDonagh M. Systematic review of the comparative effectiveness of antiepileptic drugs for fibromyalgia. *J Pain* 2011;12:407-15.
- Wang XF, Li JD, Peng Y, Dai Y, Shi G, Xu W. Interleukin-2 receptor antagonists in liver transplantation: a meta-analysis of randomized trials. *Transplant Proc* 2010;42:4567-72.
- Xu HB, Xu Q, Li L. A literature-based meta-analysis taxane-based doublet versus single-agent taxane chemotherapy in patients with advanced breast cancer. *J Cancer Res Clin Oncol* 2011;137:1005-13.
- Ziakas PD, Kourbeti IS, Voulgarelis M, Mylonakis E. Effectiveness of systemic antifungal prophylaxis in patients with neutropenia after chemotherapy: a meta-analysis of randomized controlled trials. *Clin Ther* 2010;32:2316-36.
